# Supplementary material for: Selective ATP recognition by boronic acid-appended cyclodextrin and a fluorescent probe supramolecular complex in water
Source: Royal Society of Chemistry journal article supplement (doi:10.1039/d3nj00139c), 2023-01-01
Supplement: d3nj00139c1.pdf [file d3nj00139c1.pdf]

## Supplementary Information

Selective ATP recognition by boronic acid-appended cyclodextrin and  
fluorescent probe supramolecular complex in water

Yota Suzuki,<sup>‡</sup> Masakage Masuko,<sup>‡</sup> Takeshi Hashimoto and Takashi Hayashita\*

Department of Materials and Life Sciences, Faculty of Science and Technology, Sophia University,  
Kioi-cho, Chiyoda-ku, Tokyo, 102-8554 (Japan)

<sup>‡</sup> These authors contributed equally.

## Table of Contents

|                                                                                             |            |
|---------------------------------------------------------------------------------------------|------------|
| <b>Experimental details .....</b>                                                           | <b>S1</b>  |
| <b>Synthetic procedure .....</b>                                                            | <b>S2</b>  |
| <b>NMR spectra.....</b>                                                                     | <b>S6</b>  |
| <b>Determination of the acid dissociation constant.....</b>                                 | <b>S8</b>  |
| <b>Fluorescence spectra at various FByCyD concentrations.....</b>                           | <b>S11</b> |
| <b>Fluorescence spectra of Zn-1 with <math>\gamma</math>CyD .....</b>                       | <b>S12</b> |
| <b>Structures of phosphate derivatives .....</b>                                            | <b>S13</b> |
| <b>UV-vis absorption spectra in the absence and presence of phosphate derivatives.....</b>  | <b>S14</b> |
| <b>Normalised fluorescence spectra of Zn-1/FByCyD .....</b>                                 | <b>S15</b> |
| <b>Fluorescence spectra of Zn-1/FByCyD with various phosphate concentrations.....</b>       | <b>S17</b> |
| <b>Determination of conditional equilibrium constant.....</b>                               | <b>S20</b> |
| <b>Determination of limit of detection .....</b>                                            | <b>S21</b> |
| <b>Fitting for the systems of the PPI and Tri additions.....</b>                            | <b>S22</b> |
| <b>Competitive experiment.....</b>                                                          | <b>S24</b> |
| <b>Fluorescence response of Zn-1 for phosphate derivatives .....</b>                        | <b>S25</b> |
| <b>Fluorescence response of Zn-1/<math>\gamma</math>CyD for phosphate derivatives .....</b> | <b>S26</b> |
| <b>Fluorescence response of Zn-1/PhyCyD for phosphate derivatives .....</b>                 | <b>S27</b> |
| <b>Comparison of fluorescence spectra in the presence of ATP .....</b>                      | <b>S28</b> |
| <b>Effect of CyD ring size on selectivity .....</b>                                         | <b>S29</b> |
| <b>ICD spectra.....</b>                                                                     | <b>S32</b> |
| <b>Robustness against apyrase .....</b>                                                     | <b>S33</b> |
| <b>Fluorescence after the apyrase addition.....</b>                                         | <b>S34</b> |

## **Experimental details**

### ***Reagents***

1-Hydroxypyrene (Tokyo Chemical Industry), 1,2-dibromoethane (Tokyo Chemical Industry), potassium carbonate (Fujifilm Wako Chemicals), 2,2'-dipicolylamine (Tokyo Chemical Industry), sodium sulfate (Fujifilm Wako Chemicals), potassium iodide (Fujifilm Wako Chemicals), ammonium chloride (Fujifilm Wako Chemicals), 4-carbox-3-fluorophenylboronic acid (Fujifilm Wako Chemicals), benzoic acid (Tokyo Chemical Industry), *N,N'*-dicyclohexylcarbodiimide (DCC, Tokyo Chemical Industry), 1-hydroxybenzotriazole monohydrate (HOBt•H<sub>2</sub>O, Tokyo Chemical Industry), 3A-amino-3A-deoxy-(2AS,3AS)-gamma-cyclodextrin hydrate (3-NH<sub>2</sub>-γ-CyD, Tokyo Chemical Industry), acetonitrile (dehydrated, Kanto Chemical Industry), tetrahydrofuran (dehydrated, stabiliser free, Fujifilm Wako Chemicals), chloroform (Kanto Chemical Industry), dichloromethane (Fujifilm Wako Chemicals), ethanol (Fujifilm Wako Chemicals), *N,N*-dimethylformamide (DMF, dehydrated, Fujifilm Wako Chemicals), and acetone (Fujifilm Wako Chemicals) were used as received from the commercial resources. Deuterium oxide (D<sub>2</sub>O, Kanto Chemical Industry), dimethyl sulfoxide-d<sub>6</sub> (DMSO-d<sub>6</sub>, Kanto Chemical Industry), chloroform-d<sub>1</sub> (CDCl<sub>3</sub>, Kanto Chemical Industry), 40% sodium deuteroxide solution (40% NaOD, Sigma Aldrich), and 35% deuterium chloride solution in D<sub>2</sub>O (35% DCl, Fujifilm Wako Chemicals) were used as received for nuclear magnetic resonance (NMR) spectroscopic measurements. Dimethyl sulfoxide (DMSO, Luminasol®, Dojindo Laboratories), disodium hydrogenphosphate (Fujifilm Wako Chemicals), sodium pyrophosphate (Alfa Aesar), pentasodium triphosphate (Fujifilm Wako Chemicals), adenosine-5'-monophosphate sodium salt (Nacalai Tesque), adenosine-5'-diphosphate disodium salt hydrate (Tokyo Chemical Industries), adenosine 5'-triphosphate disodium salt hydrate (Tokyo Chemical Industries), guanosine 5'-triphosphate disodium salt (Fujifilm Wako Chemicals), cytidine 5'-triphosphate disodium salt n-hydrate (Fujifilm Wako Chemicals), uridine 5'-triphosphate trisodium salt n-hydrate (Fujifilm Wako Chemicals), γ-cyclodextrin (γCyD, Kanto Chemical Industry), β-cyclodextrin (βCyD, Kanto Chemical Industry), zinc nitrate hexahydrate 99.9% (Fujifilm Wako Chemicals), 2-[4-(2-hydroxyethyl)-1-piperazinyl]ethanesulfonic acid (HEPES, Dojindo Laboratories), sodium hydroxide (Fujifilm Wako Chemicals), apyrase from potatoes (Sigma Aldrich), and Milli-Q water were used for spectroscopic measurement.

## Synthetic procedure

### Synthesis of **1-Br**

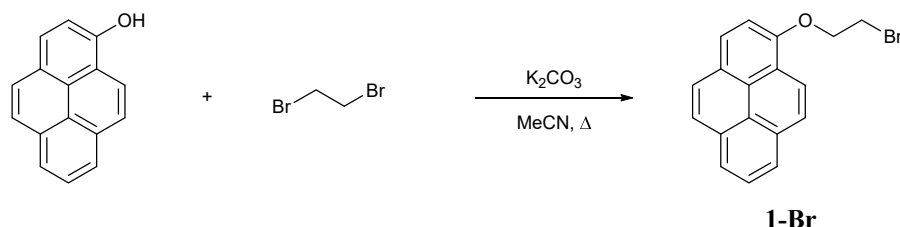

1-Hydroxypyrene (0.453 g, 2.08 mmol), 1,2-dibromoethane (2.035 g, 10.83 mmol), potassium carbonate (1.097 g, 7.937 mmol), and dehydrated acetonitrile (20 mL) were added into a round-bottom flask under an argon atmosphere. The suspension was refluxed at 85°C overnight. The reaction mixture was cooled to room temperature, subsequently the solvent was removed using a rotary evaporator. Chloroform (30 mL) was added into the residue, then the organic solution was washed with water (4 × 40 mL) using a separating funnel. The organic layer was dried over anhydrous sodium sulfate and filtered, then the filtrate was concentrated. Excess amount of ethanol was added into the concentrated solution, resulting in the precipitation of white solids. The solid was collected by filtration and washed with water and ethanol. The obtained solid was dried under reduced pressure. The desired product, **1-Br**, was yielded as a white solid (81.74 mg, 0.25 mmol, 12%). The production of **1-Br** was confirmed by the <sup>1</sup>H NMR spectra, which was identical with the literature data.<sup>1</sup>

<sup>1</sup>H NMR (CDCl<sub>3</sub>, 500 MHz): δ 8.50 (d, J = 8.6 Hz, 1H), 8.14-8.06 (m, 4H), 7.99-7.91 (m, 3H), 7.53 (d, J = 8.0 Hz, 1H), 4.66 (t, J = 6.3 Hz, 2H), 3.86 (t, J = 6.3 Hz, 2H).

HRMS (m/z): (FAB) calcd. for C<sub>18</sub>H<sub>13</sub>BrO [M<sup>+</sup>]: 324.0174, found 324.0150.

### Synthesis of **1**

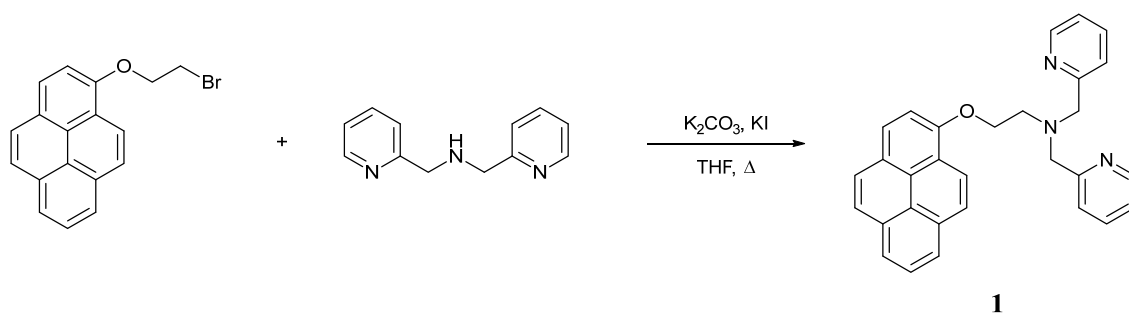

**1-Br** (81.7 mg, 0.251 mmol), potassium carbonate (0.253 g, 1.83 mmol), potassium iodide (0.231 g, 1.39 mmol), and dehydrated tetrahydrofuran (20 mL) were added into a round-bottom flask under

an argon atmosphere. Into the mixture, 2,2'-dipicolylamine (0.307 g, 1.54 mmol) dissolved in dehydrated tetrahydrofuran (5 mL) was added dropwise with stirring at room temperature. The suspension was refluxed at 70°C for 2 days. After cooling to room temperature, the reaction mixture was filtered to remove off insoluble salts. The organic solvent was removed from the filtrate using a rotary evaporator. The residue was dissolved in dichloromethane (30 mL), subsequently the organic solution was washed with 10% ammonium chloride aq. (2 × 20 mL) and water (2 × 20 mL). The organic layer was dried over anhydrous sodium sulfate and filtered, then the filtrate was concentrated to dryness using a rotary evaporator. The residue was purified by size-exclusion chromatography using chloroform as an eluent. The desired product, **1**, was yielded as a brown solid (74.78 mg, 0.17 mmol, 67%).

<sup>1</sup>H NMR (CDCl<sub>3</sub> + 1% D<sub>2</sub>O, 500 MHz): δ 8.54-8.50 (m, 2H), 8.42 (d, J = 9.2 Hz, 1H), 8.09 (dd, J = 10.9, 7.4 Hz, 2H), 8.02 (dd, J = 8.6, 5.7 Hz, 2H), 7.94 (m, 2H), 7.87 (d, J = 9.2 Hz, 1H), 7.58 (m, 4H), 7.43 (d, J = 8.6 Hz, 1H), 7.12 (t, J = 5.7 Hz, 2H), 4.44 (t, J = 5.4 Hz, 2H), 4.11 (s, 4H), 3.31 (t, J = 5.4 Hz, 2H).

<sup>13</sup>C{<sup>1</sup>H} NMR (CDCl<sub>3</sub> + 1% D<sub>2</sub>O, 125 MHz) δ 159.3, 152.8, 149.1, 136.7, 131.8, 131.7, 127.3, 126.4, 126.2, 125.9, 125.5, 125.4, 125.1, 125.0, 124.4, 124.2, 123.2, 122.2, 121.4, 120.4, 109.1, 67.0, 61.1, 53.6.

HRMS (m/z): (ESI) calcd. for C<sub>30</sub>H<sub>26</sub>N<sub>3</sub>O [M + H<sup>+</sup>]: 444.20759, found 444.20603.

### Synthesis of **FByCyD**

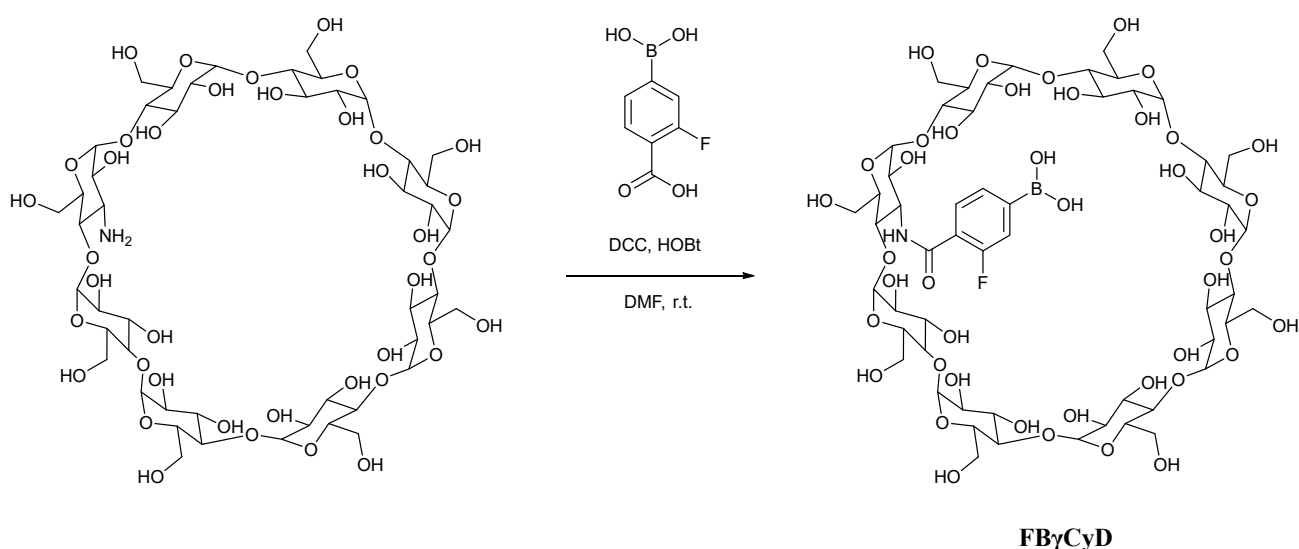

**FByCyD** was synthesised according to previously reported method.<sup>2</sup>

4-carboxy-3-fluorophenylboronic acid (0.044 g, 0.24 mmol), DCC (0.062 g, 0.30 mmol), and HOBT·H<sub>2</sub>O (0.046 g, 0.30 mmol) were dissolved in 5 mL of dehydrated DMF and stirred in ice bath

for 30 min. 3-NH<sub>2</sub>- $\gamma$ -CyD (0.259 g, 0.20 mmol) dissolved in 5 mL of dehydrated DMF was added into this suspension and stirred in an ice bath for 30 min and at room temperature for 20 hours. The solution concentrated by distillation under reduced pressure was stored in a refrigerator for more than 24 hours to precipitate a reaction byproduct. The floated byproduct was removed by cotton filtration, and the filtrate was poured into 800 mL of acetone while stirring. The suspension was subjected to suction filtration using a membrane filter (TYPE: JHWP). The obtained white solid was dissolved in 10 mL of deionised water and lyophilised under reduced pressure to obtain a white powder (0.250 g, 0.170 mmol, 85%). The <sup>1</sup>H NMR and HR mass spectra were identical to the reported data.<sup>4</sup>

<sup>1</sup>H NMR (D<sub>2</sub>O, 500 MHz):  $\delta$  7.68 (t, 1H), 7.49 (d, 1H), 7.40 (d, 1H), 5.05-4.91 (m, 8H), 3.88-3.34 (m, 48H).

HRMS (m/z): (ESI+) calcd. for C<sub>55</sub>H<sub>85</sub>BFNO<sub>42</sub> [M + Na]<sup>+</sup>: 1484.4521, found 1484.4935.

### Synthesis of *Ph $\gamma$* CyD

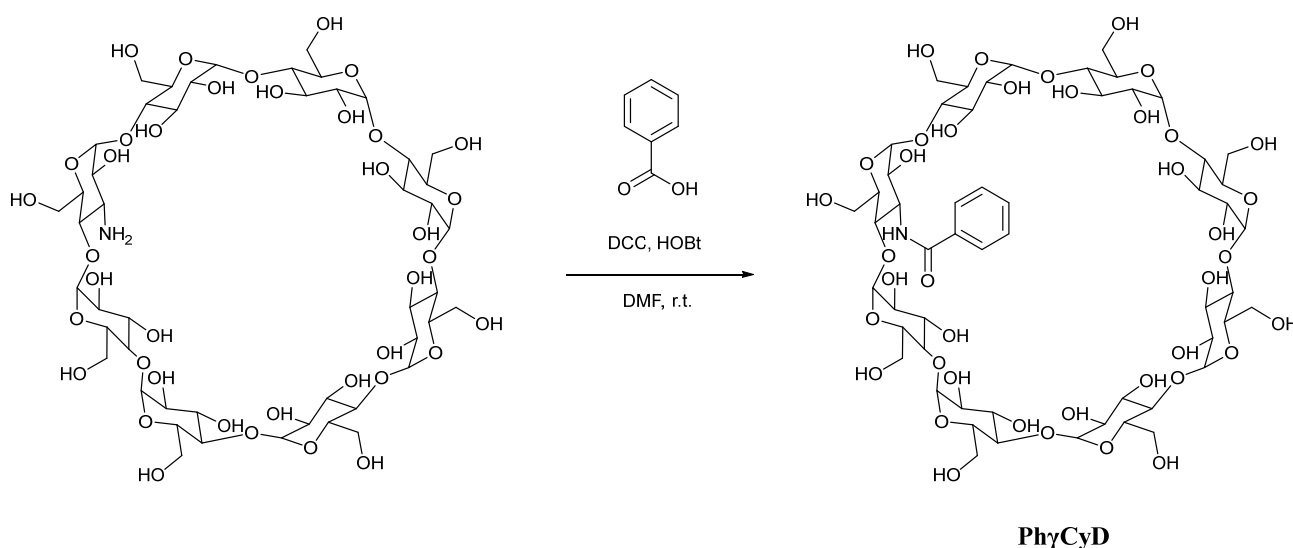

Benzoic acid (0.032 g, 0.26 mmol), DCC (0.063 g, 0.31 mmol), and HOBT·H<sub>2</sub>O (0.047 g, 0.31 mmol) were dissolved in 5 mL of dehydrated DMF and stirred in ice bath for 30 min. 3-NH<sub>2</sub>- $\gamma$ -CyD (0.256 g, 0.20 mmol) dissolved in 5 mL of dehydrated DMF was added into this suspension and stirred in an ice bath for 30 min and at room temperature for 20 hours. The solution concentrated by distillation under reduced pressure was stored in a refrigerator for more than 24 hours to precipitate a reaction byproduct. The floated byproduct was removed by cotton filtration, and the filtrate was poured into 800 mL of acetone while stirring. The suspension was subjected to suction filtration using a membrane filter (TYPE: JHWP). The obtained white solid was dissolved in 10 mL of deionised water and lyophilised under reduced pressure to obtain a white powder (0.231 g, 0.165 mmol, 83%).

<sup>1</sup>H NMR (D<sub>2</sub>O, 500 MHz):  $\delta$  7.80 (d, J = 8.0 Hz, 2H), 7.62 (t, J = 7.2 Hz, 1H), 7.55 (t, J = 7.4 Hz,

2H), 5.17-5.05 (m, 8H), 4.61-3.56 (m, 48H).

**<sup>13</sup>C NMR** (D<sub>2</sub>O, 125 MHz): δ 171.6, 134.3, 132.9, 129.5, 127.8, 103.5, 102.3, 102.2, 102.1, 101.9, 101.8, 101.8, 81.1, 81.0, 80.8, 80.5, 80.1, 79.9, 73.8, 73.7, 73.6, 73.2, 73.0, 73.0, 72.9, 72.7, 72.5, 72.4, 72.2, 69.8, 61.0, 60.8, 60.7, 52.3.

**HRMS (m/z)**: (ESI<sup>-</sup>) calcd. for C<sub>55</sub>H<sub>84</sub>NO<sub>40</sub> [M - H]<sup>-</sup>: 1398.45696, found 1398.44560.

## NMR spectra

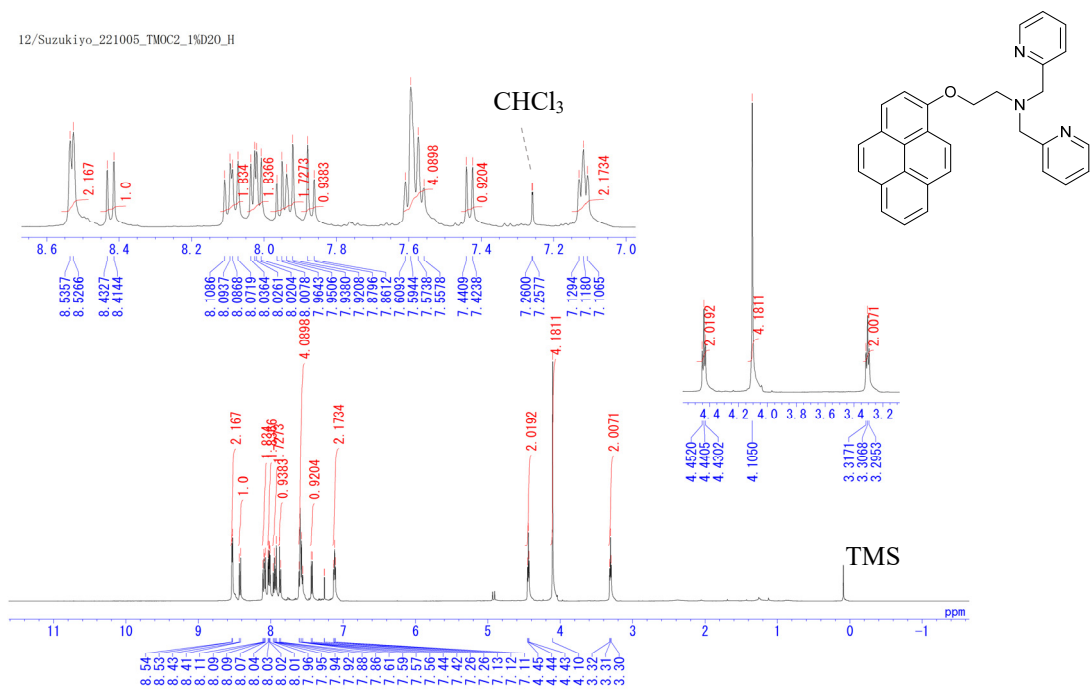

Figure S1. <sup>1</sup>H NMR spectrum of **1** in CDCl<sub>3</sub> + 1vol% D<sub>2</sub>O.

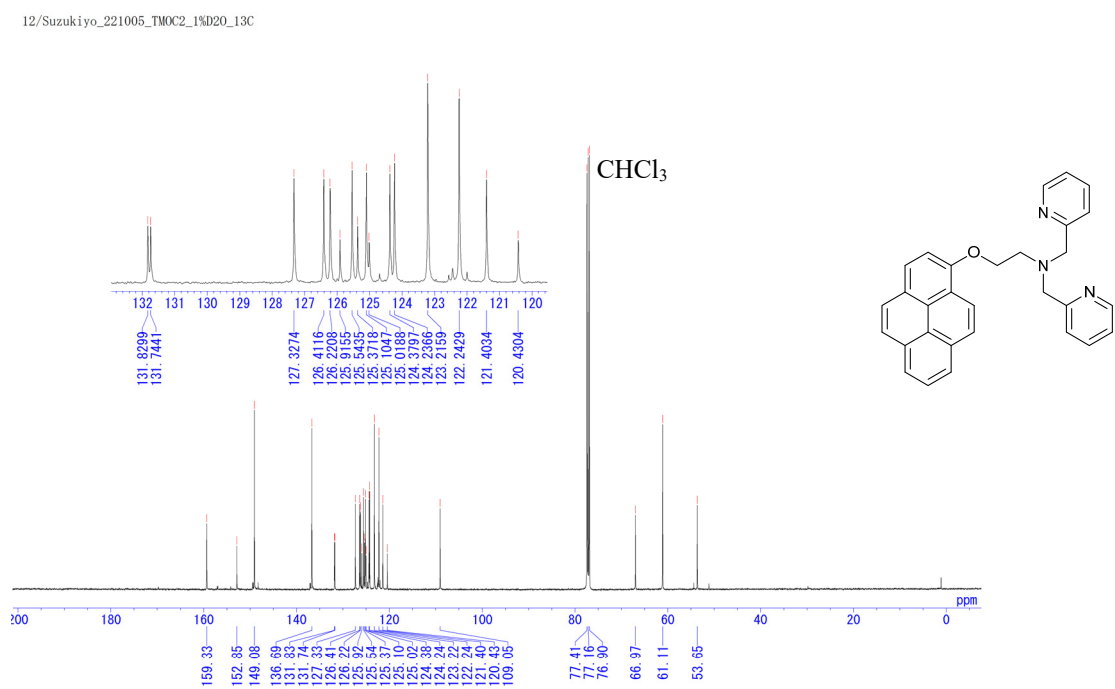

Figure S2. <sup>13</sup>C NMR spectrum of **1** in CDCl<sub>3</sub> + 1vol% D<sub>2</sub>O.



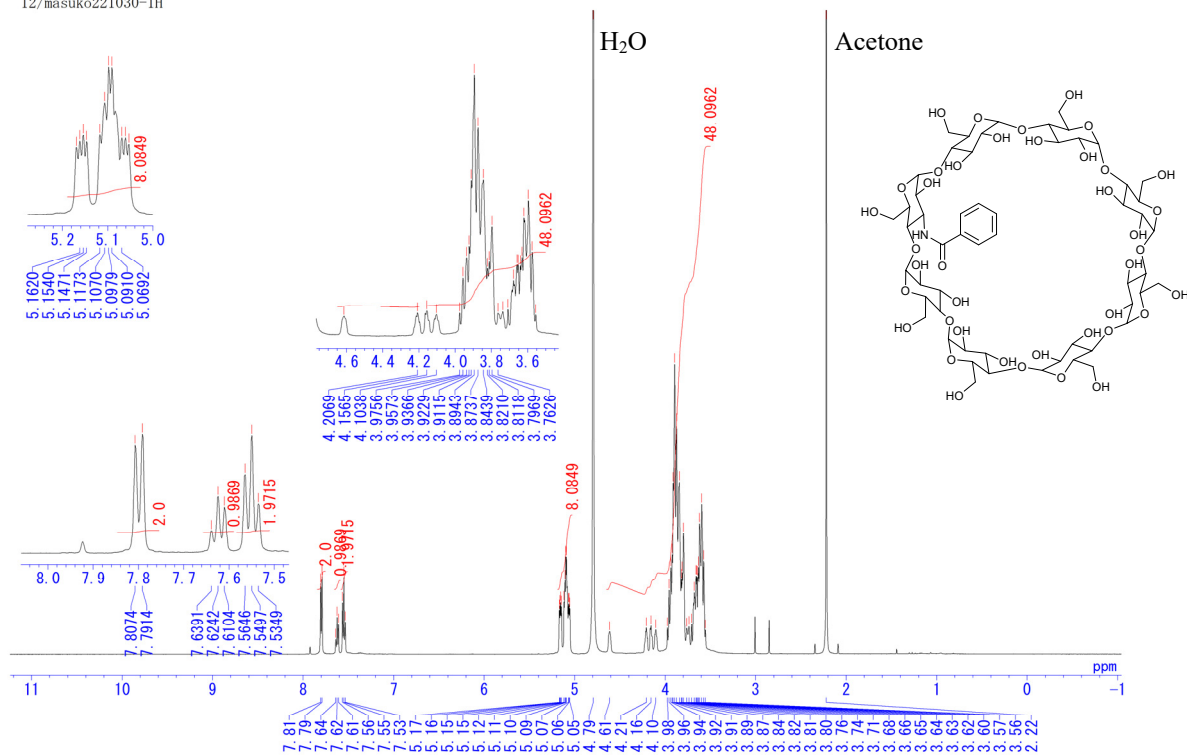

Figure S3.  $^1\text{H}$  NMR spectrum of **PhyCyD** in  $\text{D}_2\text{O}$ . 3  $\mu\text{L}$  of acetone was added as an internal standard.

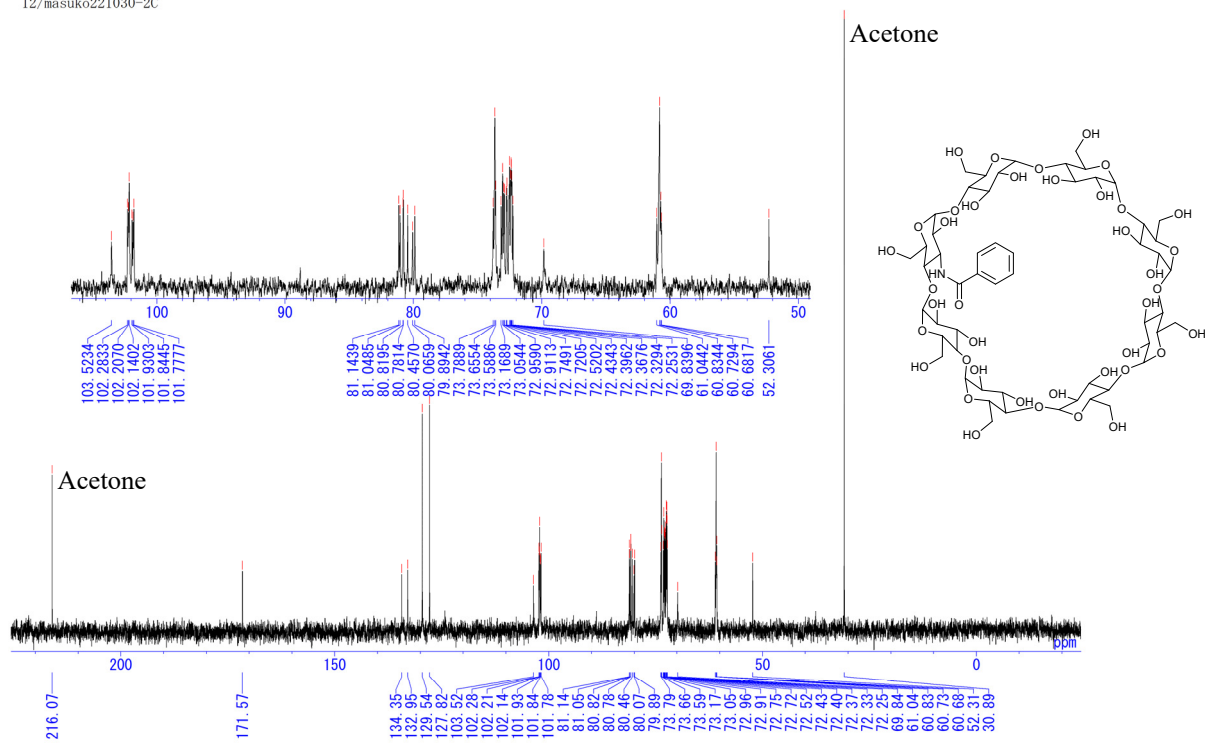

Figure S4.  $^{13}\text{C}$  NMR spectrum of **PhyCyD** in  $\text{D}_2\text{O}$ . 3  $\mu\text{L}$  of acetone was added as an internal standard.

## Determination of the acid dissociation constant

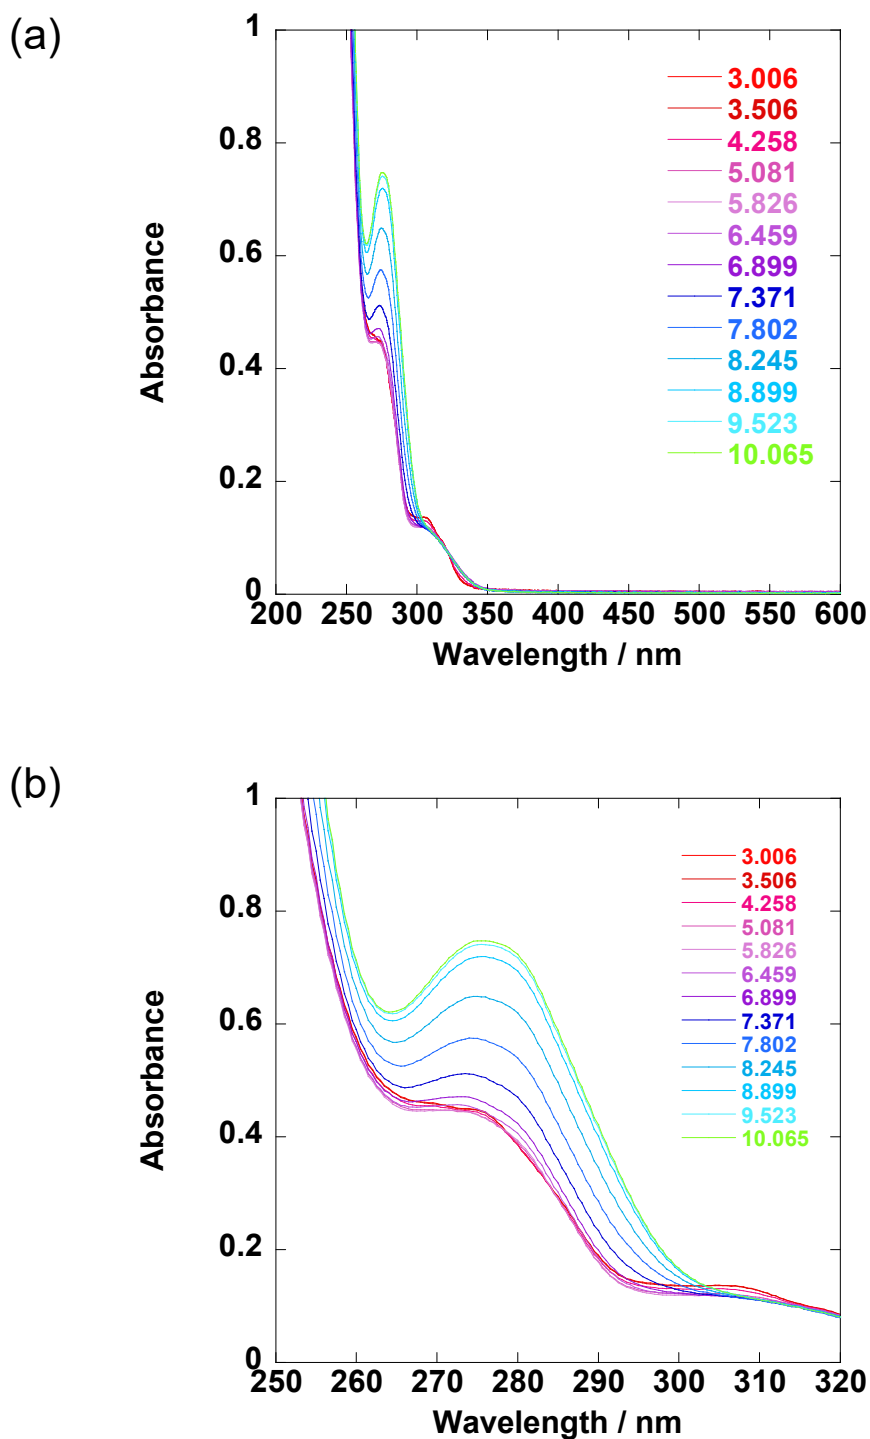

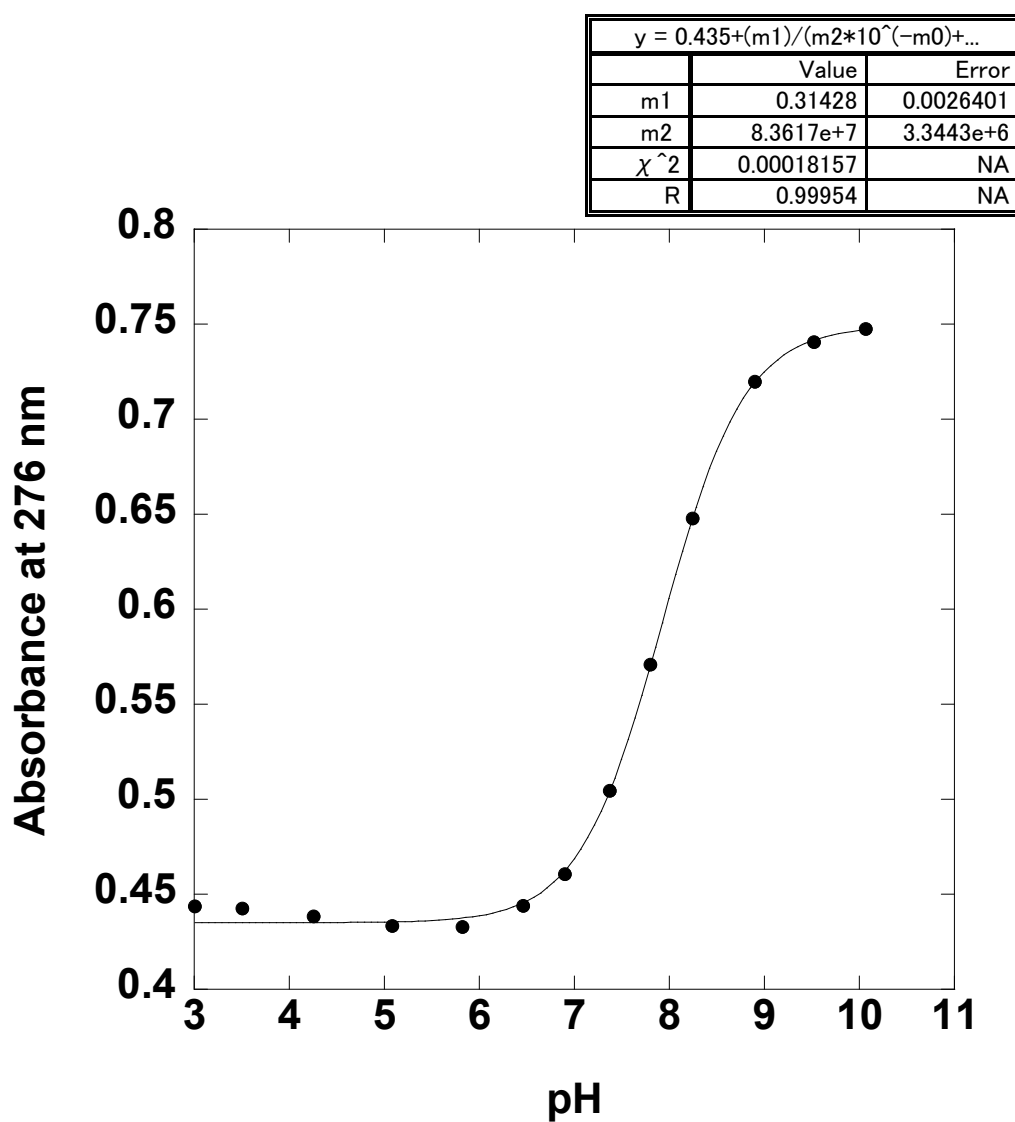

Figure S6. Absorbance at 276 nm of **FByCyD** (0.5 mM) in water under various pH conditions: 5 mM phosphate buffer and  $T = 25^\circ\text{C}$ . The plots were fitted with the theoretical equation of the acid dissociation model of monobasic acids.

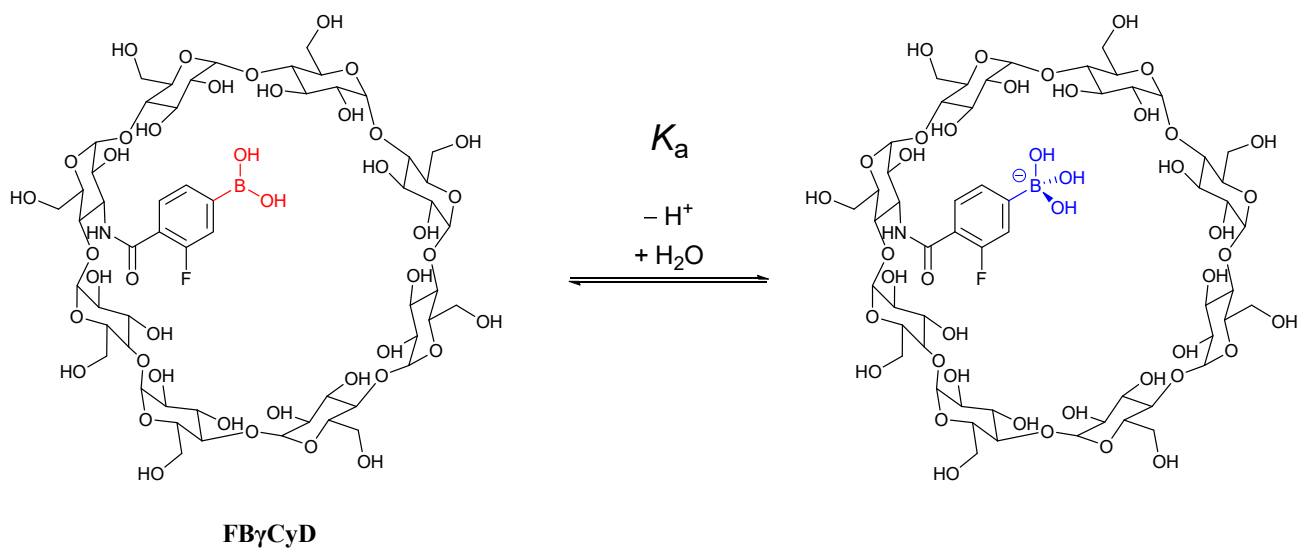

Scheme S1. Acid dissociation equilibrium of **FB $\gamma$ CyD** in aqueous solution.

According to Scheme S1, the total concentration of HA ( $C_A$ ) and the acid dissociation constant ( $K_a$ ) of **FB $\gamma$ CyD** are written as follows:

$$C_A = [\text{HA}] + [\text{A}^-] \quad (\text{S1})$$

$$K_a = \frac{[\text{A}^-][\text{H}^+]}{[\text{HA}]} \quad (\text{S2})$$

In Eqs. S1 and S2,  $[\text{HA}]$  and  $[\text{A}^-]$  denote the concentrations of **FB $\gamma$ CyD** and its conjugate base, respectively. Substitution of Eq. S2 into Eq. S1 affords Eq. S3.

$$\frac{C_A}{[\text{A}^-]} = \frac{[\text{H}^+]}{K_a} + 1 \quad (\text{S3})$$

$$\therefore \frac{[\text{A}^-]}{C_A} = \left( \frac{[\text{H}^+]}{K_a} + 1 \right)^{-1} \quad (\text{S4})$$

As  $\text{pH} = 7.40$  and  $\text{p}K_a = 7.92$ ,

$$\frac{[\text{A}^-]}{C_A} = 0.23$$

## Fluorescence spectra at various FByCyD concentrations

(a)

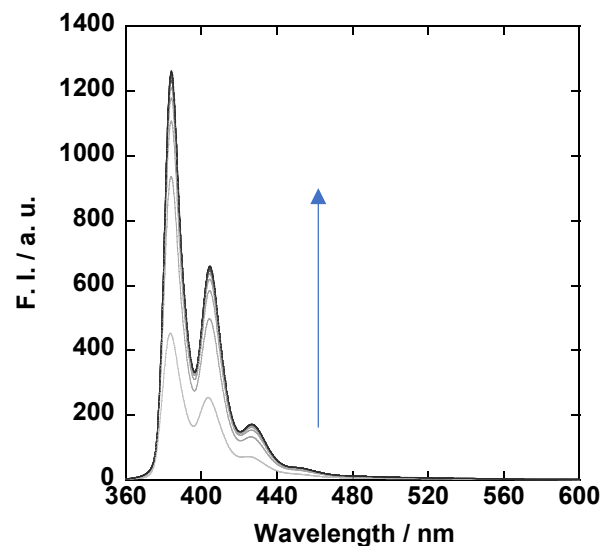

(b)

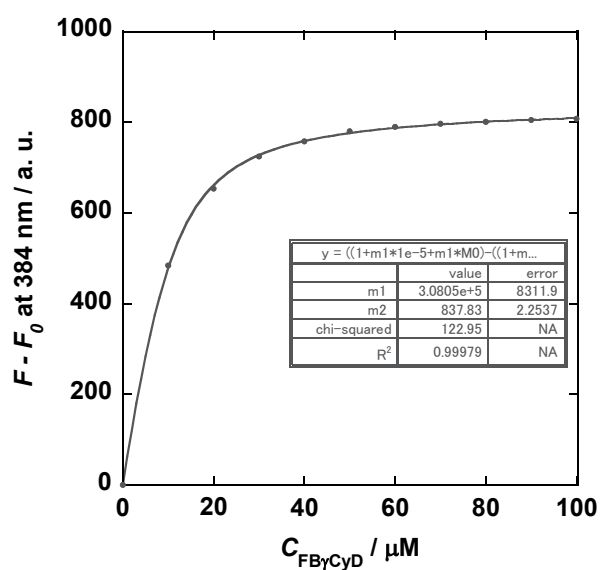

Figure S7. Fluorescence spectra (a) and the enhancement of the fluorescence intensity ( $F - F_0$ ) of **Zn-1** with increasing the concentration of **FByCyD** in DMSO/water (1/99 in vol.):  $C_1 = 10 \mu\text{M}$ ,  $C_{\text{Zn}} = 10 \mu\text{M}$ ,  $C_{\text{HEPES}} = 5 \text{ mM}$ , pH 7.4,  $T = 25^\circ\text{C}$ , and  $\lambda_{\text{ex}} = 350 \text{ nm}$ . The abbreviations  $F$  and  $F_0$  denote the fluorescence intensity of **Zn-1** in the presence and absence of **FByCyD**, respectively.

## Fluorescence spectra of Zn-1 with $\gamma$ CyD

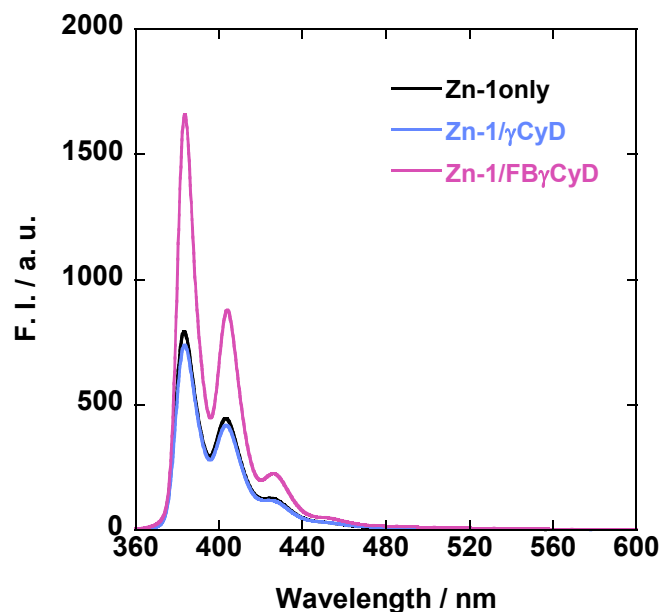

Figure S8. Fluorescence spectra of **Zn-1** in the absence and presences of  $\gamma$ **CyD** and **FByCyD** in DMSO/water (1/99 in vol.):  $C_1 = 10 \mu\text{M}$ ,  $C_{\text{Zn}} = 10 \mu\text{M}$ ,  $C_{\gamma\text{CyD}} = 0.1 \text{ mM}$ ,  $C_{\text{FByCyD}} = 0.1 \text{ mM}$ ,  $C_{\text{HEPES}} = 5 \text{ mM}$ , pH 7.4,  $T = 25^\circ\text{C}$ , and  $\lambda_{\text{ex}} = 350 \text{ nm}$ .

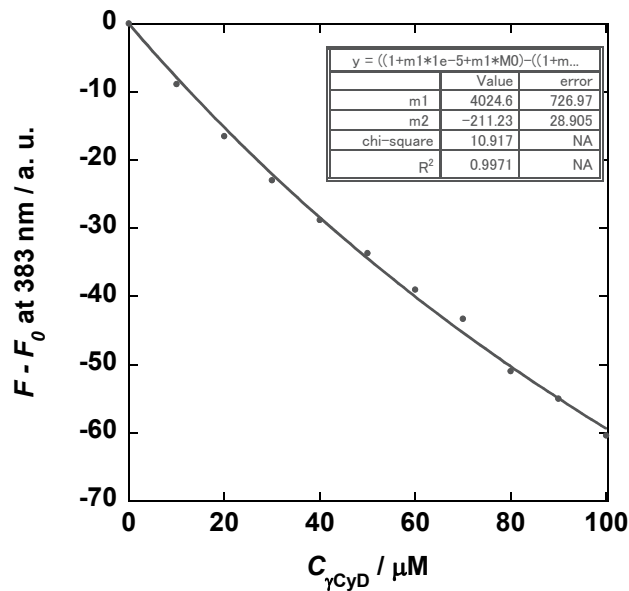

Figure S9. Change in the fluorescence intensity ( $F - F_0$ ) of 383 nm of **Zn-1** with increasing the concentration of  $\gamma$ **CyD** in DMSO/water (1/99 in vol.):  $C_1 = 10 \mu\text{M}$ ,  $C_{\text{Zn}} = 10 \mu\text{M}$ ,  $C_{\text{HEPES}} = 5 \text{ mM}$ , pH 7.4,  $T = 25^\circ\text{C}$ , and  $\lambda_{\text{ex}} = 350 \text{ nm}$ . The abbreviations  $F$  and  $F_0$  denote the fluorescence intensity of **Zn-1** in the presence and absence of  $\gamma$ **CyD**, respectively.

## Structures of phosphate derivatives

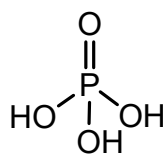

Monophosphate (Pi)

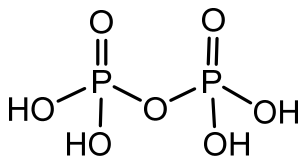

Pyrophosphate (PPi)

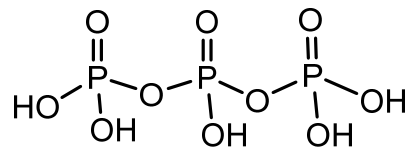

Triphosphate (Tri)

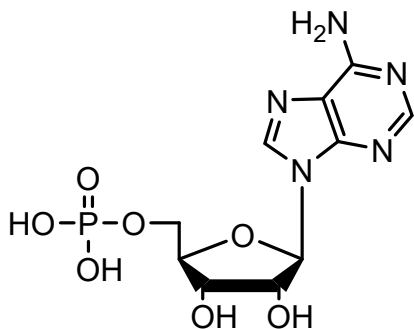

Adenosine-5'-monophosphate (AMP)

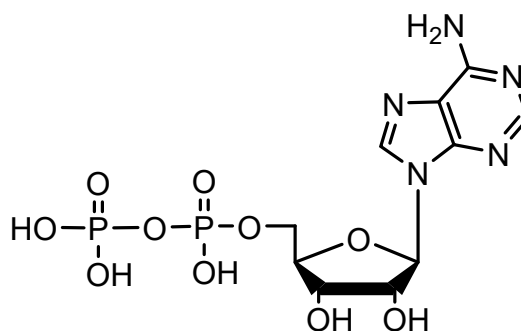

Adenosine-5'-diphosphate (ADP)

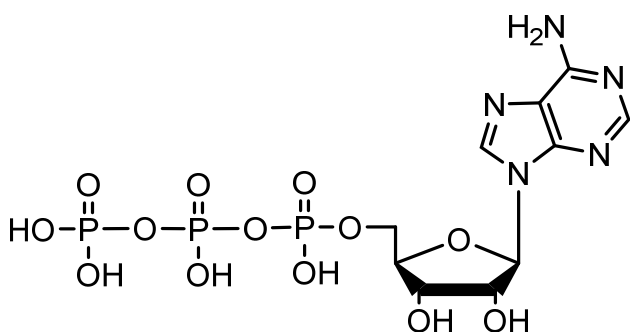

Adenosine-5'-triphosphate (ATP)

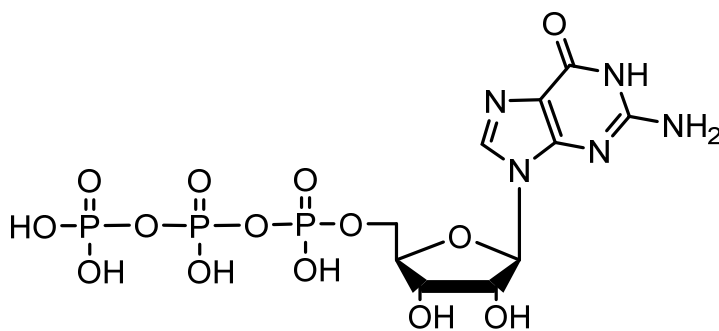

Guanosine-5'-triphosphate (GTP)

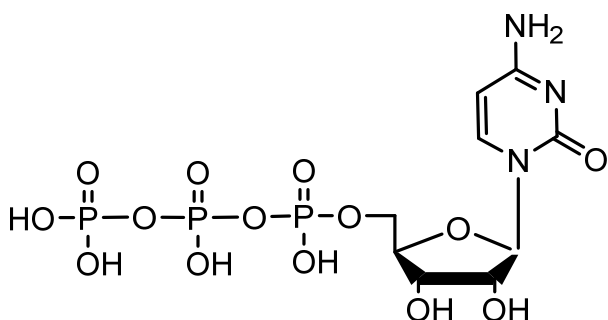

Cytidine-5'-triphosphate (CTP)

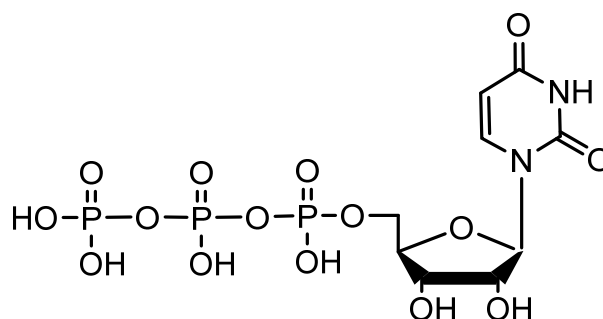

Uridine-5'-triphosphate (UTP)

Chart S1. The structures of phosphate derivatives.

## UV-vis absorption spectra in the absence and presence of phosphate derivatives

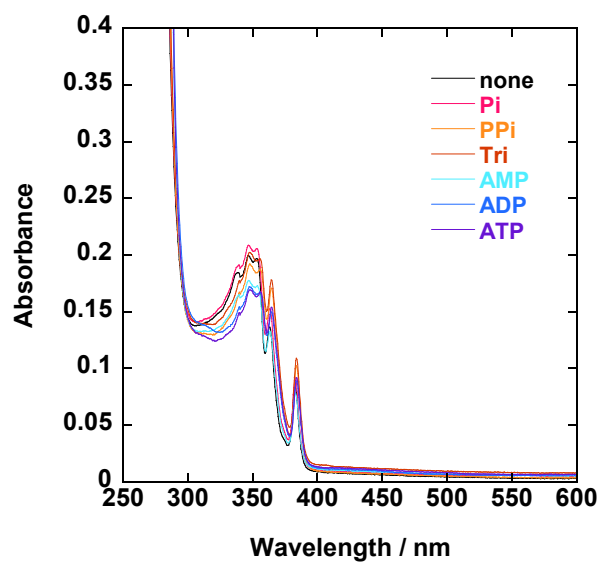

Figure S10. UV-vis absorption spectra of **Zn-1/FByCyD** in the absence and presence of various 1 mM of phosphate derivatives in DMSO/water (1/99 in vol.):  $C_1 = 10 \mu\text{M}$ ,  $C_{\text{Zn}} = 10 \mu\text{M}$ ,  $C_{\text{FByCyD}} = 0.5 \text{ mM}$ ,  $C_{\text{HEPES}} = 5 \text{ mM}$ , pH 7.4, and  $T = 25^\circ\text{C}$ .



### Normalised fluorescence spectra of Zn-1/FByCyD

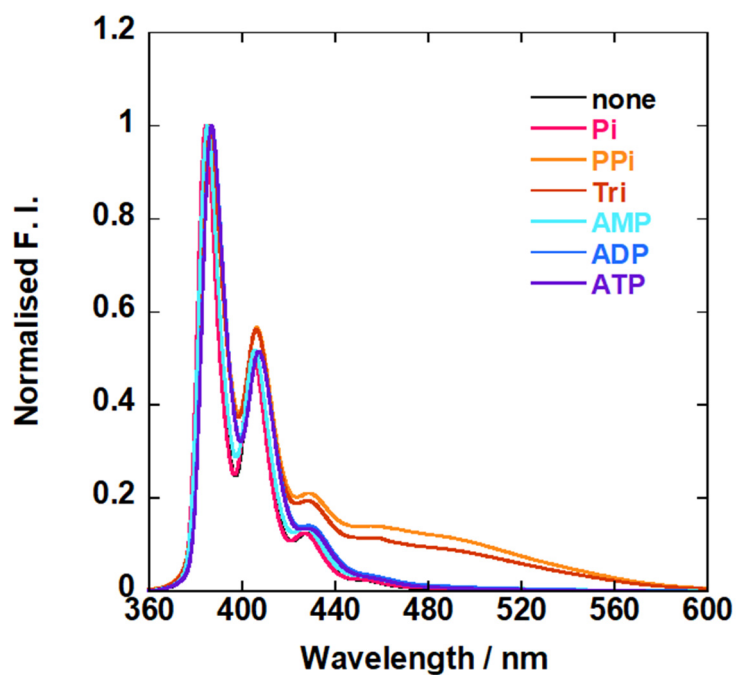

Figure S11. Normalised fluorescence spectra of **Zn-1/FByCyD** in the absence and presence of various 1.0 mM of phosphate derivatives in DMSO/water (1/99 in vol.):  $C_1 = 10 \mu\text{M}$ ,  $C_{\text{Zn}} = 10 \mu\text{M}$ ,  $C_{\text{FByCyD}} = 0.5 \text{ mM}$ ,  $C_{\text{HEPES}} = 5 \text{ mM}$ , pH 7.4,  $T = 25^\circ\text{C}$ , and  $\lambda_{\text{ex}} = 350 \text{ nm}$ .

(a)

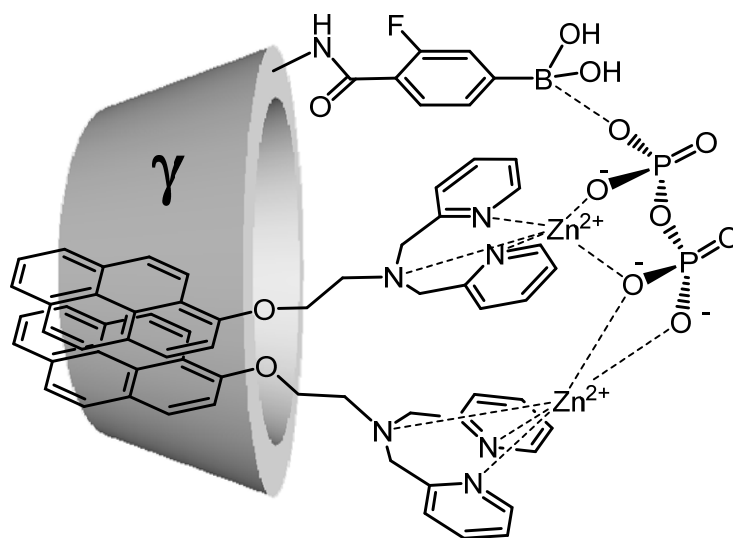

**PPI-(Zn-1)<sub>2</sub>/FB $\gamma$ CyD**

(b)

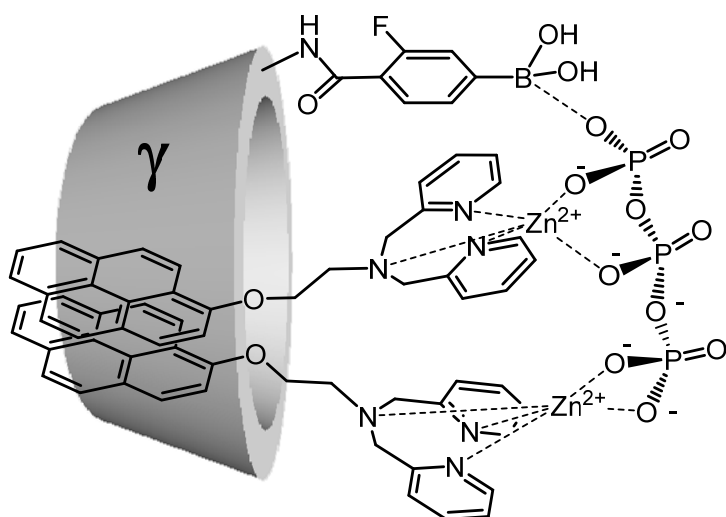

**Tri-(Zn-1)<sub>2</sub>/FB $\gamma$ CyD**

Chart S2. Plausible structures of PPI-(Zn-1)<sub>2</sub>/FB $\gamma$ CyD (a) and Tri-(Zn-1)<sub>2</sub>/FB $\gamma$ CyD (b).

## Fluorescence spectra of Zn-1/FByCyD with various phosphate concentrations

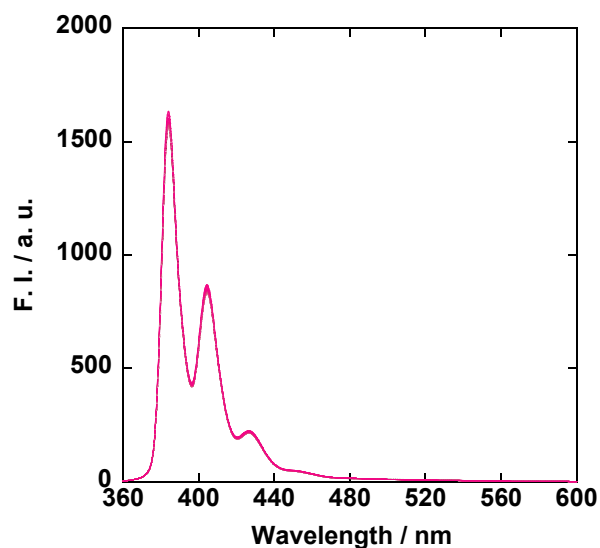

Figure S12. Change in fluorescence spectra of **Zn-1/FByCyD** with increasing Pi concentration in DMSO/water (1/99 in vol.):  $C_1 = 10 \mu\text{M}$ ,  $C_{\text{Zn}} = 10 \mu\text{M}$ ,  $C_{\text{FByCyD}} = 0.1 \text{ mM}$ ,  $C_{\text{HEPES}} = 5 \text{ mM}$ , pH 7.4,  $T = 25^\circ\text{C}$ , and  $\lambda_{\text{ex}} = 350 \text{ nm}$ .

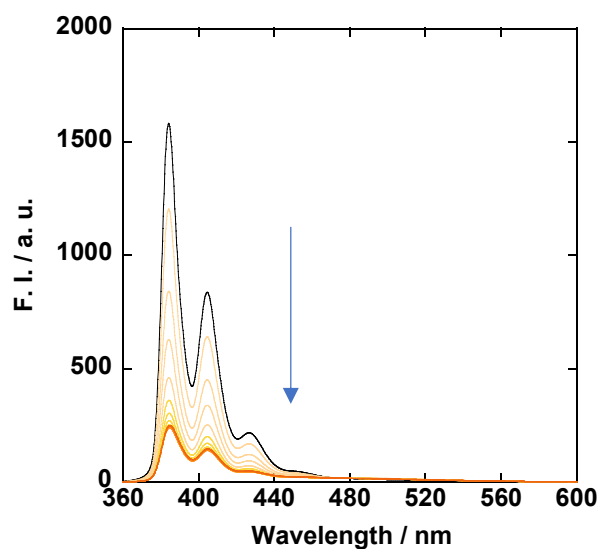

Figure S13. Change in fluorescence spectra of **Zn-1/FByCyD** with increasing PPI concentration in DMSO/water (1/99 in vol.):  $C_1 = 10 \mu\text{M}$ ,  $C_{\text{Zn}} = 10 \mu\text{M}$ ,  $C_{\text{FByCyD}} = 0.1 \text{ mM}$ ,  $C_{\text{HEPES}} = 5 \text{ mM}$ , pH 7.4,  $T = 25^\circ\text{C}$ , and  $\lambda_{\text{ex}} = 350 \text{ nm}$ .

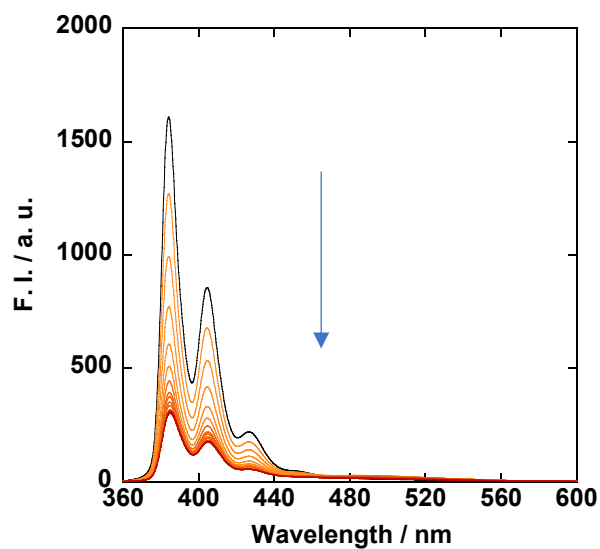

Figure S14. Change in fluorescence spectra of **Zn-1/FB $\gamma$ CyD** with increasing Tri concentration in DMSO/water (1/99 in vol.):  $C_1 = 10 \mu\text{M}$ ,  $C_{\text{Zn}} = 10 \mu\text{M}$ ,  $C_{\text{FB}\gamma\text{CyD}} = 0.1 \text{ mM}$ ,  $C_{\text{HEPES}} = 5 \text{ mM}$ , pH 7.4,  $T = 25^\circ\text{C}$ , and  $\lambda_{\text{ex}} = 350 \text{ nm}$ .

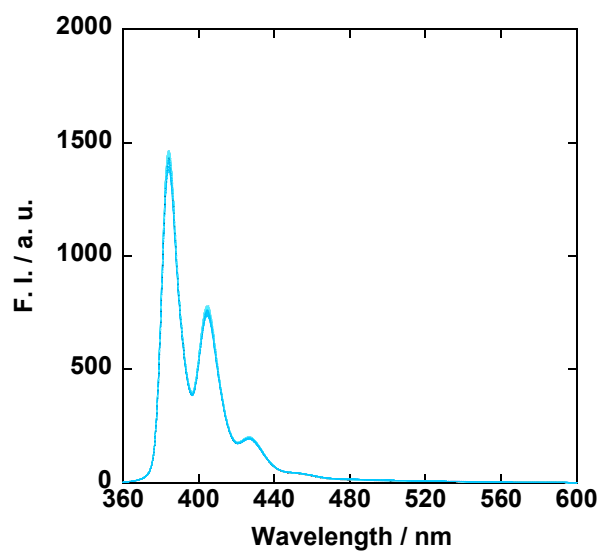

Figure S15. Change in fluorescence spectra of **Zn-1/FB $\gamma$ CyD** with increasing AMP concentration in DMSO/water (1/99 in vol.):  $C_1 = 10 \mu\text{M}$ ,  $C_{\text{Zn}} = 10 \mu\text{M}$ ,  $C_{\text{FB}\gamma\text{CyD}} = 0.1 \text{ mM}$ ,  $C_{\text{HEPES}} = 5 \text{ mM}$ , pH 7.4,  $T = 25^\circ\text{C}$ , and  $\lambda_{\text{ex}} = 350 \text{ nm}$ .

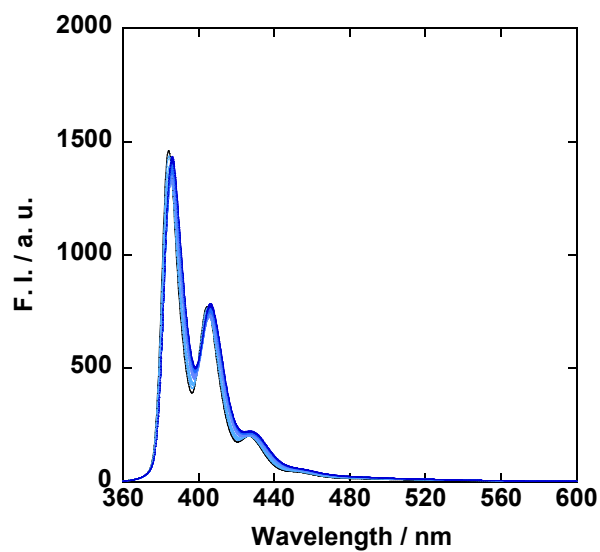

Figure S16. Change in fluorescence spectra of **Zn-1/FB $\gamma$ CyD** with increasing ADP concentration in DMSO/water (1/99 in vol.):  $C_1 = 10 \mu\text{M}$ ,  $C_{\text{Zn}} = 10 \mu\text{M}$ ,  $C_{\text{FB}\gamma\text{CyD}} = 0.1 \text{ mM}$ ,  $C_{\text{HEPES}} = 5 \text{ mM}$ , pH 7.4,  $T = 25^\circ\text{C}$ , and  $\lambda_{\text{ex}} = 350 \text{ nm}$ .

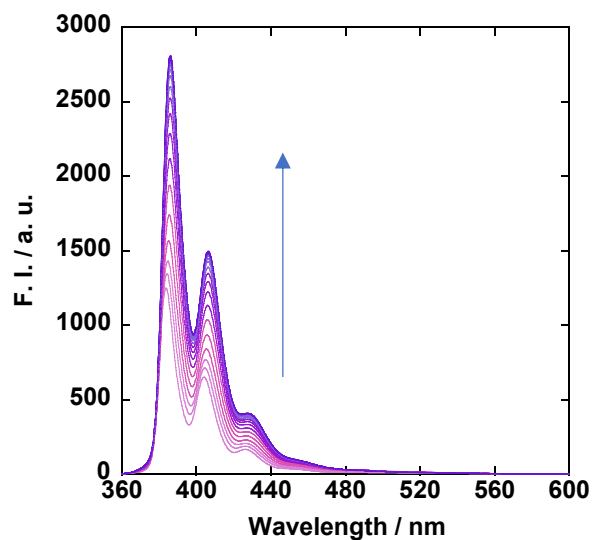

Figure S17. Change in fluorescence spectra of **Zn-1/FB $\gamma$ CyD** with increasing ATP concentration in DMSO/water (1/99 in vol.):  $C_1 = 10 \mu\text{M}$ ,  $C_{\text{Zn}} = 10 \mu\text{M}$ ,  $C_{\text{FB}\gamma\text{CyD}} = 0.1 \text{ mM}$ ,  $C_{\text{HEPES}} = 5 \text{ mM}$ , pH 7.4,  $T = 25^\circ\text{C}$ , and  $\lambda_{\text{ex}} = 350 \text{ nm}$ .

## Determination of conditional equilibrium constant

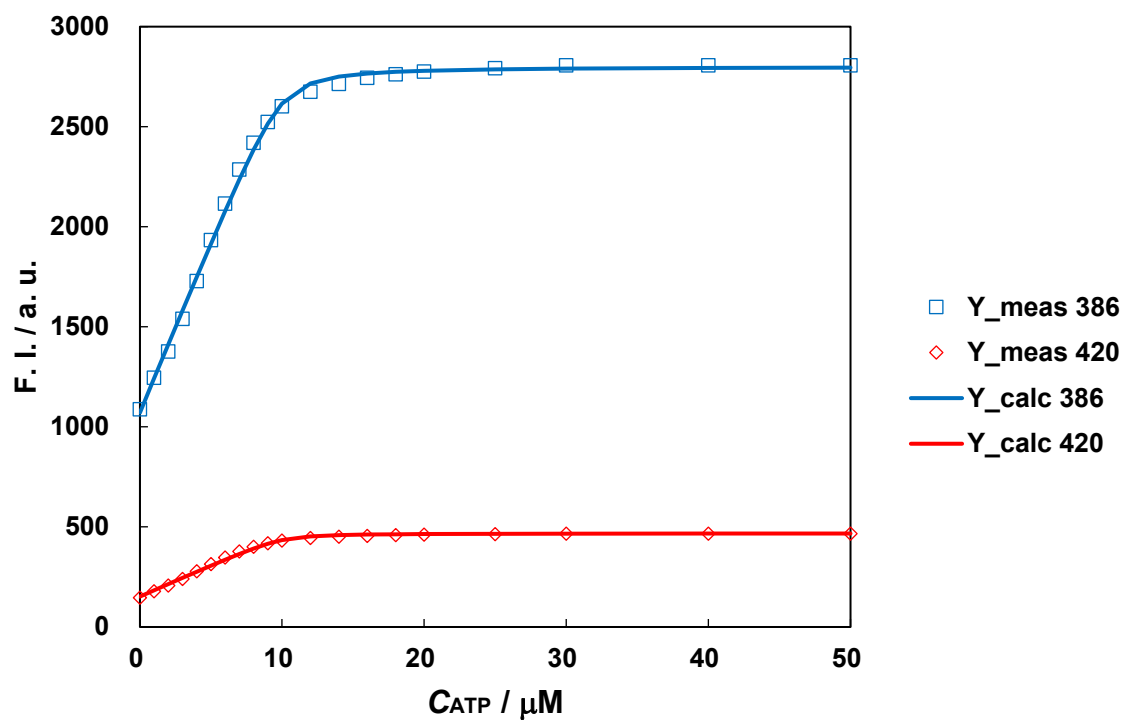

Figure S18. Fluorescence intensities of **Zn-1/FByCyD** at various ATP concentrations in DMSO/water (1/99 in vol.):  $C_1 = 10 \mu M$ ,  $C_{Zn} = 10 \mu M$ ,  $C_{FByCyD} = 0.1 \text{ mM}$ ,  $C_{HEPES} = 5 \text{ mM}$ , pH 7.4,  $T = 25^\circ C$ , and  $\lambda_{ex} = 350 \text{ nm}$ . The plots indicate experimental values. Solid lines indicate fitting values determined by the ReactLab program based on a 1:1 stoichiometric reaction model.

## Determination of limit of detection

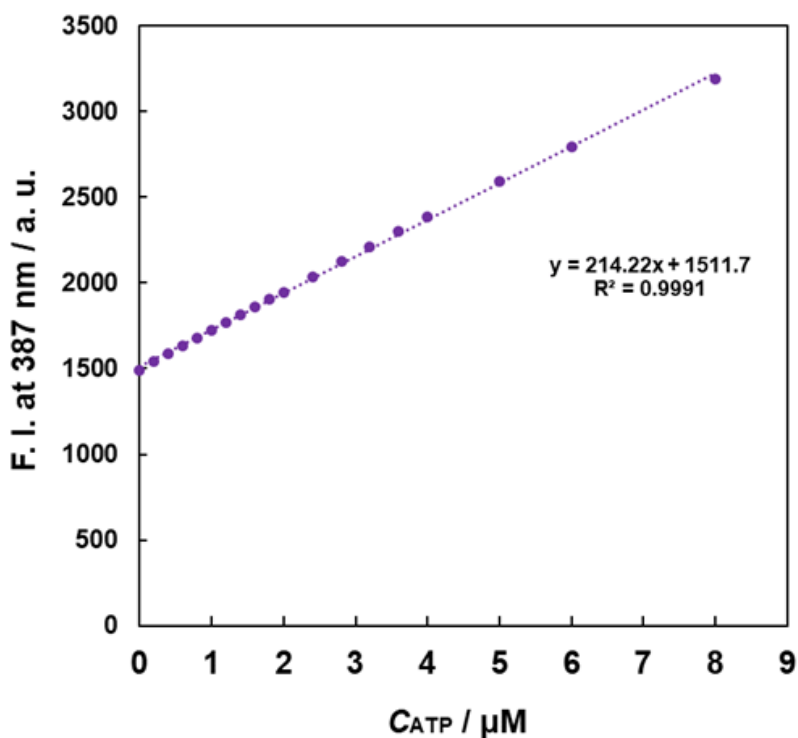

Figure S19. Calibration curve of **Zn-1/FB $\gamma$ CyD** for the detection of ATP in DMSO/water (1/99 in vol.):  $C_1 = 10 \mu\text{M}$ ,  $C_{\text{Zn}} = 10 \mu\text{M}$ ,  $C_{\text{FB}\gamma\text{CyD}} = 0.5 \text{ mM}$ ,  $C_{\text{HEPES}} = 5 \text{ mM}$ , pH 7.4,  $T = 25^\circ\text{C}$ , and  $\lambda_{\text{ex}} = 350 \text{ nm}$ .

The limit of detection (LOD) of **Zn-1/FB $\gamma$ CyD** was calculated as the following equation.

$$\text{LOD} = \frac{3\sigma}{a} \quad (\text{S5})$$

In Eq. S5,  $a$  denotes the slope of the calibration curve for the quantification of ATP (Figure S19). The  $\sigma$  value indicates the standard deviation of the blank data corresponding to the fluorescence intensity of **Zn-1/FB $\gamma$ CyD** in the absence of ATP. The  $\sigma$  value was calculated according to Eq. S6.

$$\sigma = \sqrt{\frac{\sum_{i=1}^n (I_{\text{B},i} - I_{\text{B,ave}})^2}{n-1}} \quad (\text{S6})$$

where  $I_{\text{B},i}$ ,  $I_{\text{B,ave}}$  and  $n$  represent the fluorescence intensity of the blank sample, the average of  $I_{\text{B},i}$ , and the number of repeated measurements ( $n = 10$ ), respectively. The  $\sigma$  value was determined to be 1.350.

## Fitting for the systems of the PPI and Tri additions

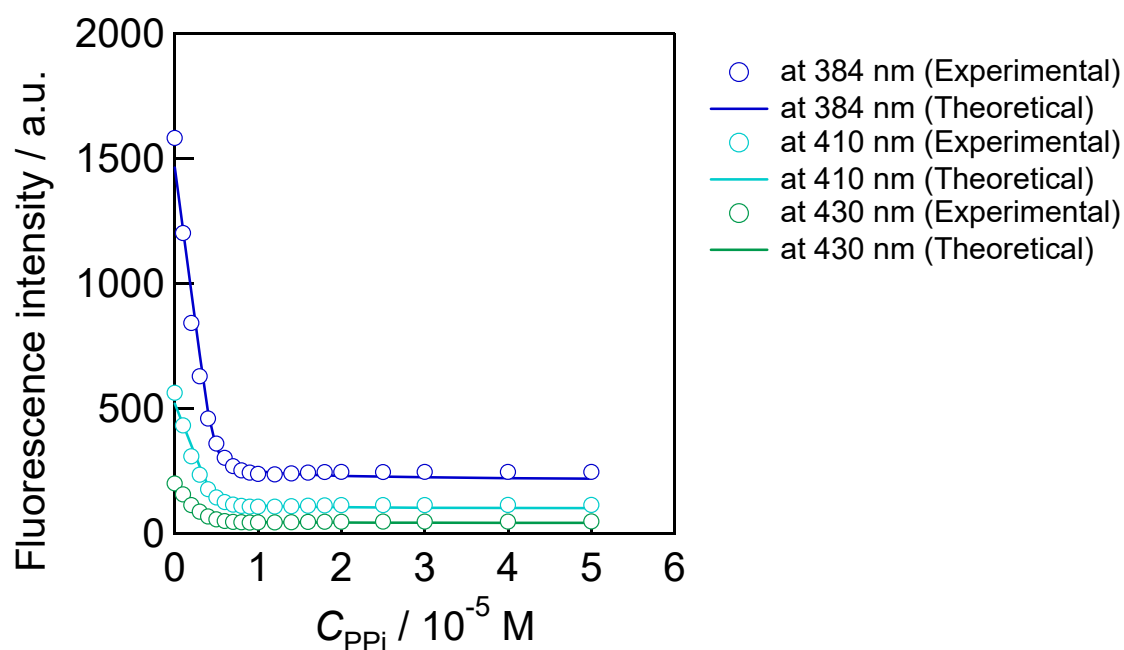

Figure S20. Fluorescence intensities of **Zn-1/FByCyD** at various PPI concentrations in DMSO/water (1/99 in vol.):  $C_1 = 10 \mu\text{M}$ ,  $C_{\text{Zn}} = 10 \mu\text{M}$ ,  $C_{\text{FByCyD}} = 0.1 \text{ mM}$ ,  $C_{\text{HEPES}} = 5 \text{ mM}$ , pH 7.4,  $T = 25^\circ\text{C}$ , and  $\lambda_{\text{ex}} = 350 \text{ nm}$ . The plots indicate experimental values. Solid lines indicate fitting values determined by the ReactLab program based on a 2:1 stoichiometric reaction model with the conditional equilibrium constant of  $(7.31 \pm 0.24) \times 10^{12} \text{ M}^{-2}$ .



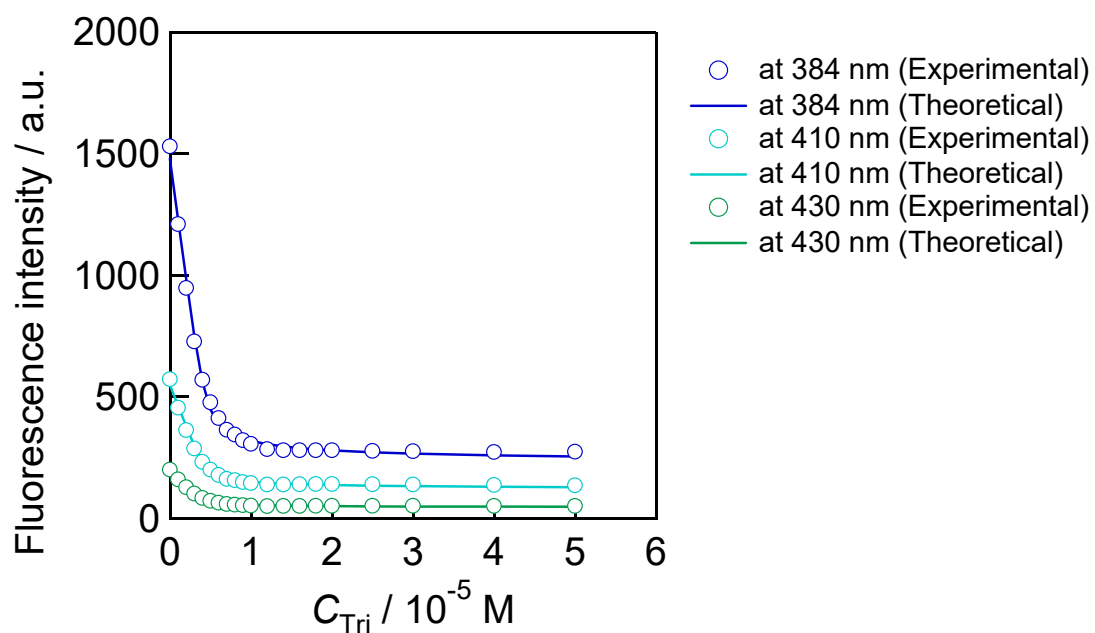

Figure S21. Fluorescence intensities of **Zn-1/FByCyD** at various Tri concentrations in DMSO/water (1/99 in vol.):  $C_1 = 10 \mu\text{M}$ ,  $C_{\text{Zn}} = 10 \mu\text{M}$ ,  $C_{\text{FByCyD}} = 0.1 \text{ mM}$ ,  $C_{\text{HEPES}} = 5 \text{ mM}$ , pH 7.4,  $T = 25^\circ\text{C}$ , and  $\lambda_{\text{ex}} = 350 \text{ nm}$ . The plots indicate experimental values. Solid lines indicate fitting values determined by the ReactLab program based on a 2:1 stoichiometric reaction model with the conditional equilibrium constant of  $(1.36 \pm 0.01) \times 10^{12} \text{ M}^{-2}$ .

## Competitive experiment

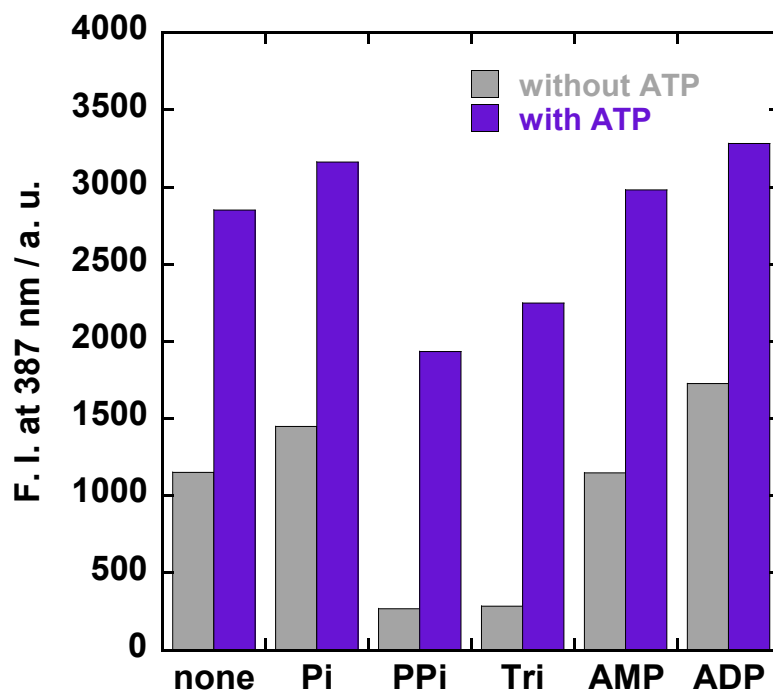

Figure S22. Fluorescence intensity at 387 nm of **Zn-1/FByCyD-ATP** in the absence and presence of various 0.10 mM of phosphate derivatives in DMSO/water (1/99 in vol.):  $C_1 = 10 \mu\text{M}$ ,  $C_{\text{Zn}} = 10 \mu\text{M}$ ,  $C_{\text{FByCyD}} = 0.1 \text{ mM}$ ,  $C_{\text{ATP}} = 0.10 \text{ mM}$ ,  $C_{\text{HEPES}} = 5 \text{ mM}$ , pH 7.4,  $T = 25^\circ\text{C}$ , and  $\lambda_{\text{ex}} = 350 \text{ nm}$ .

## Fluorescence response of Zn-1 for phosphate derivatives

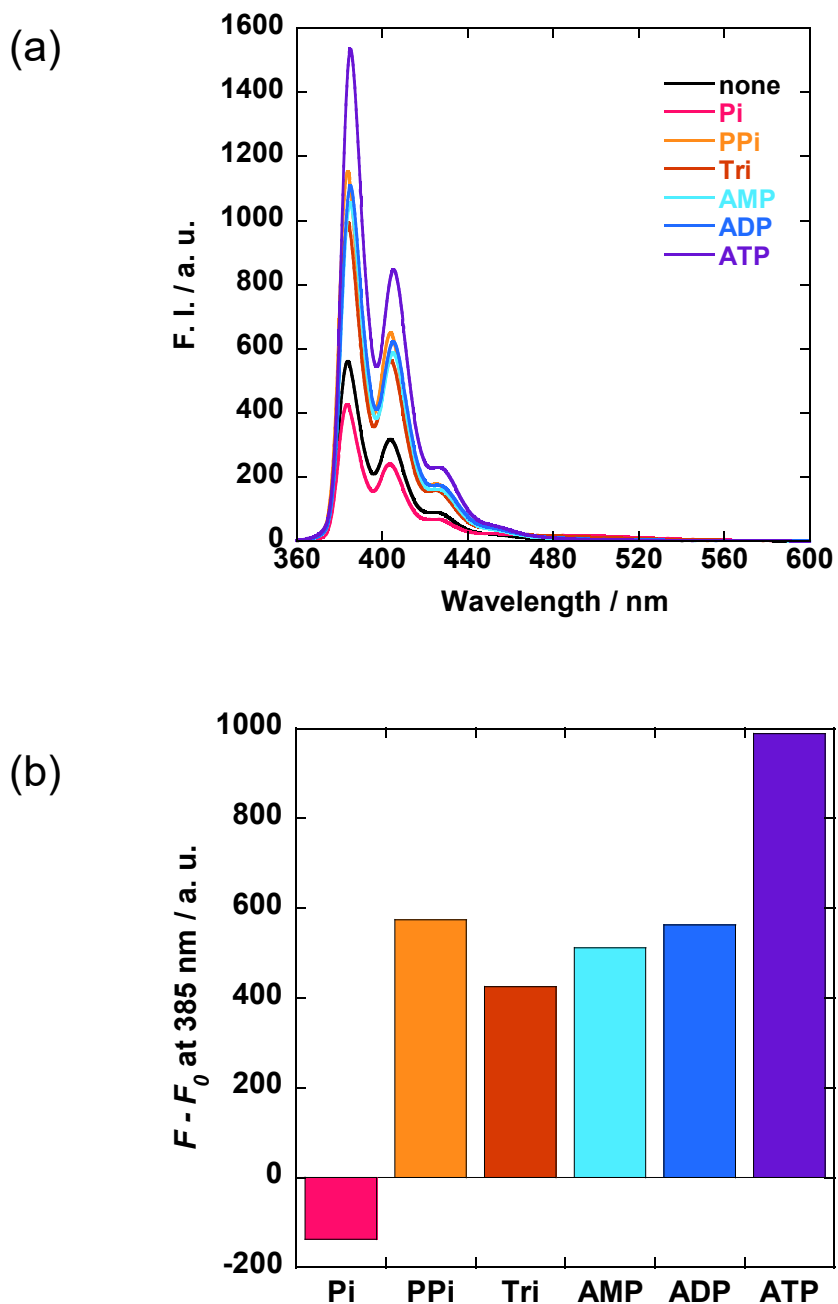

Figure S23. Fluorescence spectra of **Zn-1** in the absence and presence of various 1.0 mM of phosphate derivatives in DMSO/water (1/99 in vol.) (a) and the difference of the fluorescence intensity at 385 nm of **Zn-1** before and after the addition of the phosphate derivatives (b):  $C_1 = 10 \mu\text{M}$ ,  $C_{\text{Zn}} = 10 \mu\text{M}$ ,  $C_{\text{HEPES}} = 5 \text{ mM}$ , pH 7.4,  $T = 25^\circ\text{C}$ , and  $\lambda_{\text{ex}} = 350 \text{ nm}$ .

## Fluorescence response of Zn-1/ $\gamma$ CyD for phosphate derivatives

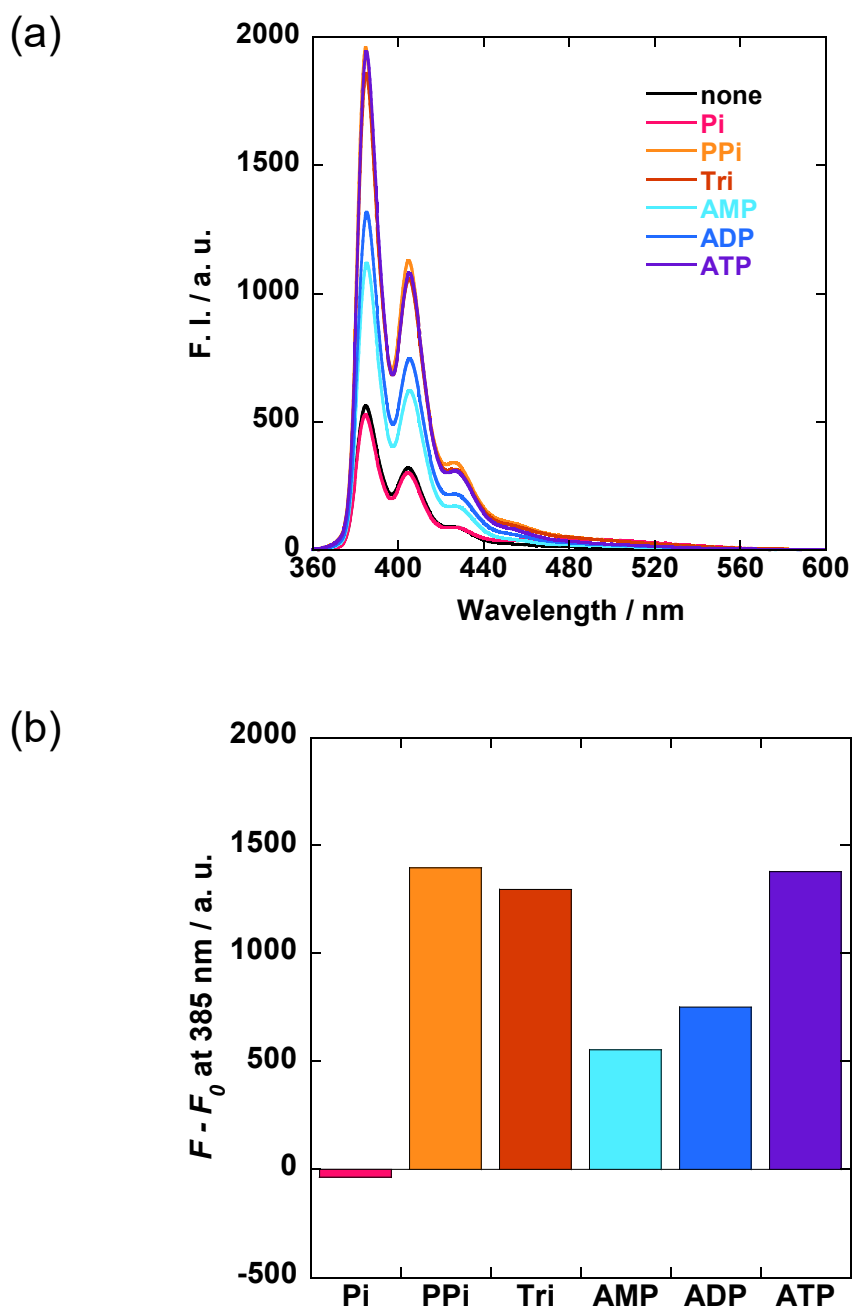

Figure S24. Fluorescence spectra of **Zn-1/ $\gamma$ CyD** in the absence and presence of various 1.0 mM of phosphate derivatives in DMSO/water (1/99 in vol.) (a) and the difference of the fluorescence intensity at 385 nm of **Zn-1/ $\gamma$ CyD** before and after the addition of the phosphate derivatives (b):  $C_1 = 10 \mu\text{M}$ ,  $C_{\text{Zn}} = 10 \mu\text{M}$ ,  $C_{\gamma\text{CyD}} = 0.5 \text{ mM}$ ,  $C_{\text{HEPES}} = 5 \text{ mM}$ , pH 7.4,  $T = 25^\circ\text{C}$ , and  $\lambda_{\text{ex}} = 350 \text{ nm}$ .

## Fluorescence response of Zn-1/PhyCyD for phosphate derivatives

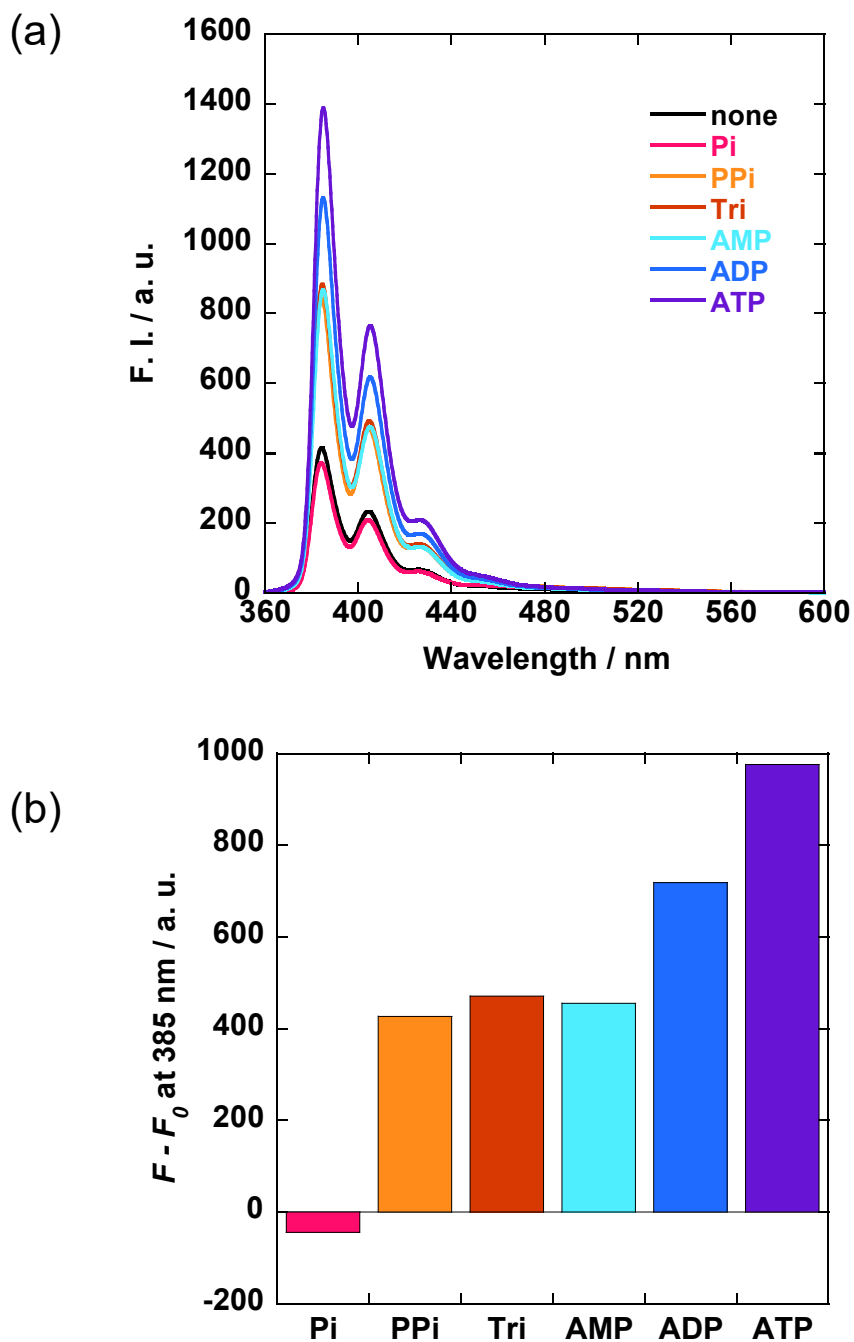

Figure S25. Fluorescence spectra of **Zn-1/PhyCyD** in the absence and presence of various 1.0 mM of phosphate derivatives in DMSO/water (1/99 in vol.) (a) and the difference of the fluorescence intensity at 385 nm of **Zn-1/PhyCyD** before and after the addition of the phosphate derivatives (b):  $C_1 = 10 \mu\text{M}$ ,  $C_{\text{Zn}} = 10 \mu\text{M}$ ,  $C_{\text{PhyCyD}} = 0.5 \text{ mM}$ ,  $C_{\text{HEPES}} = 5 \text{ mM}$ , pH 7.4,  $T = 25^\circ\text{C}$ , and  $\lambda_{\text{ex}} = 350 \text{ nm}$ .

## Comparison of fluorescence spectra in the presence of ATP

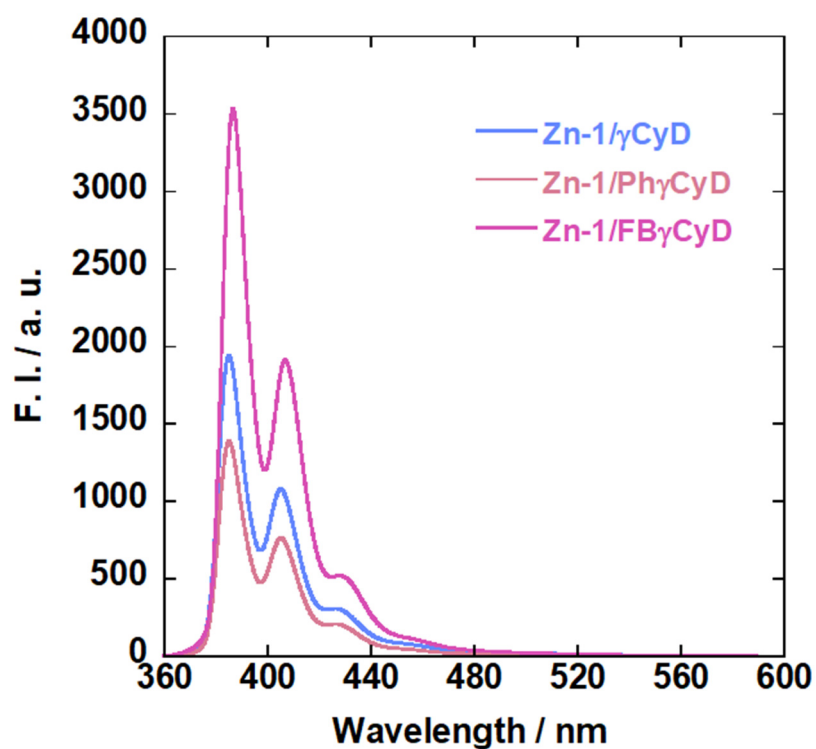

Figure S26. Fluorescence spectra of **Zn-1/γCyD**, **Zn-1/PhγCyD**, and **Zn-1/FBγCyD** in the presence of ATP (1 mM) in DMSO/water (1/99 in vol.):  $C_1 = 10 \mu\text{M}$ ,  $C_{\text{Zn}} = 10 \mu\text{M}$ ,  $C_{\text{CyD}} = 0.5 \text{ mM}$ ,  $C_{\text{HEPES}} = 5 \text{ mM}$ , pH 7.4,  $T = 25^\circ\text{C}$ , and  $\lambda_{\text{ex}} = 350 \text{ nm}$ .

## Effect of CyD ring size on selectivity

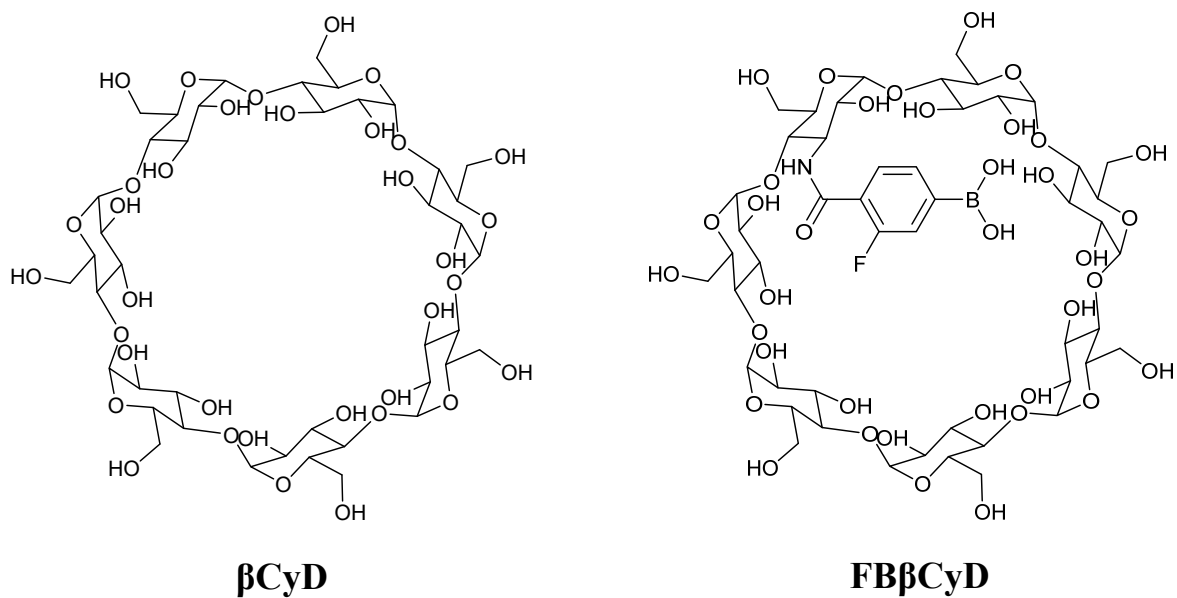

Chart S3. The structures of  **$\beta$ CyD** and **FB $\beta$ CyD**. **FB $\beta$ CyD** was synthesised according to our previous report.<sup>2</sup> The synthesis was confirmed by <sup>1</sup>H NMR spectrum and HRMS-ESI(-).

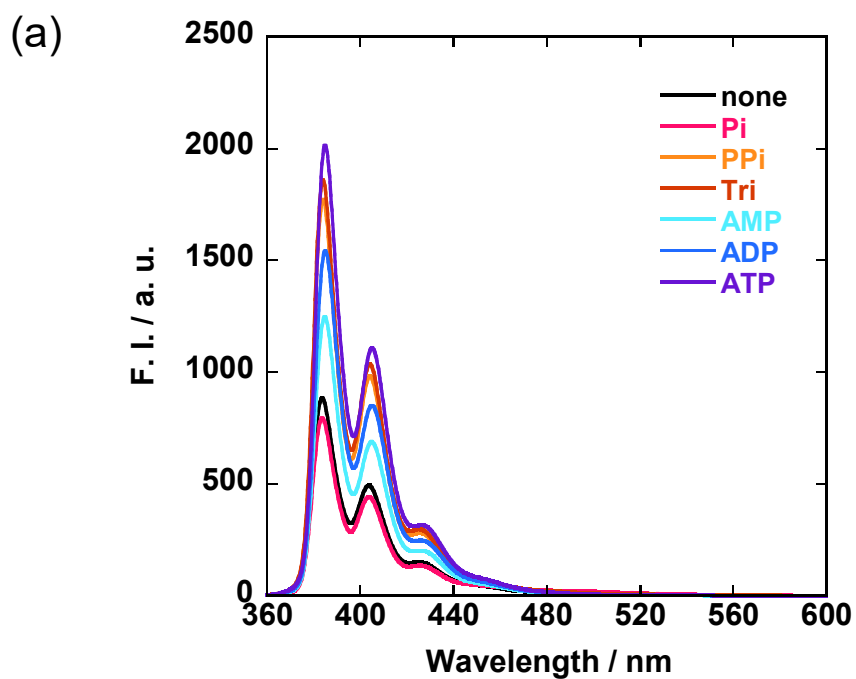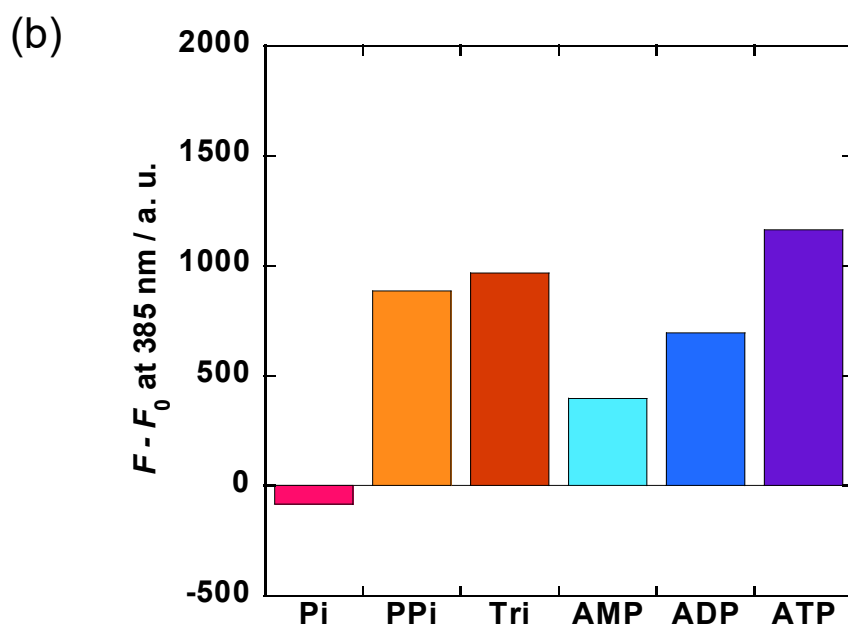

Figure S27. Fluorescence spectra of **Zn-1/βCyD** in the absence and presence of various 1.0 mM of phosphate derivatives in DMSO/water (1/99 in vol.) (a) and the difference of the fluorescence intensity at 385 nm of **Zn-1/βCyD** before and after the addition of the phosphate derivatives (b):  $C_1 = 10 \mu\text{M}$ ,  $C_{\text{Zn}} = 10 \mu\text{M}$ ,  $C_{\beta\text{CyD}} = 0.5 \text{ mM}$ ,  $C_{\text{HEPES}} = 5 \text{ mM}$ , pH 7.4,  $T = 25^\circ\text{C}$ , and  $\lambda_{\text{ex}} = 350 \text{ nm}$ .



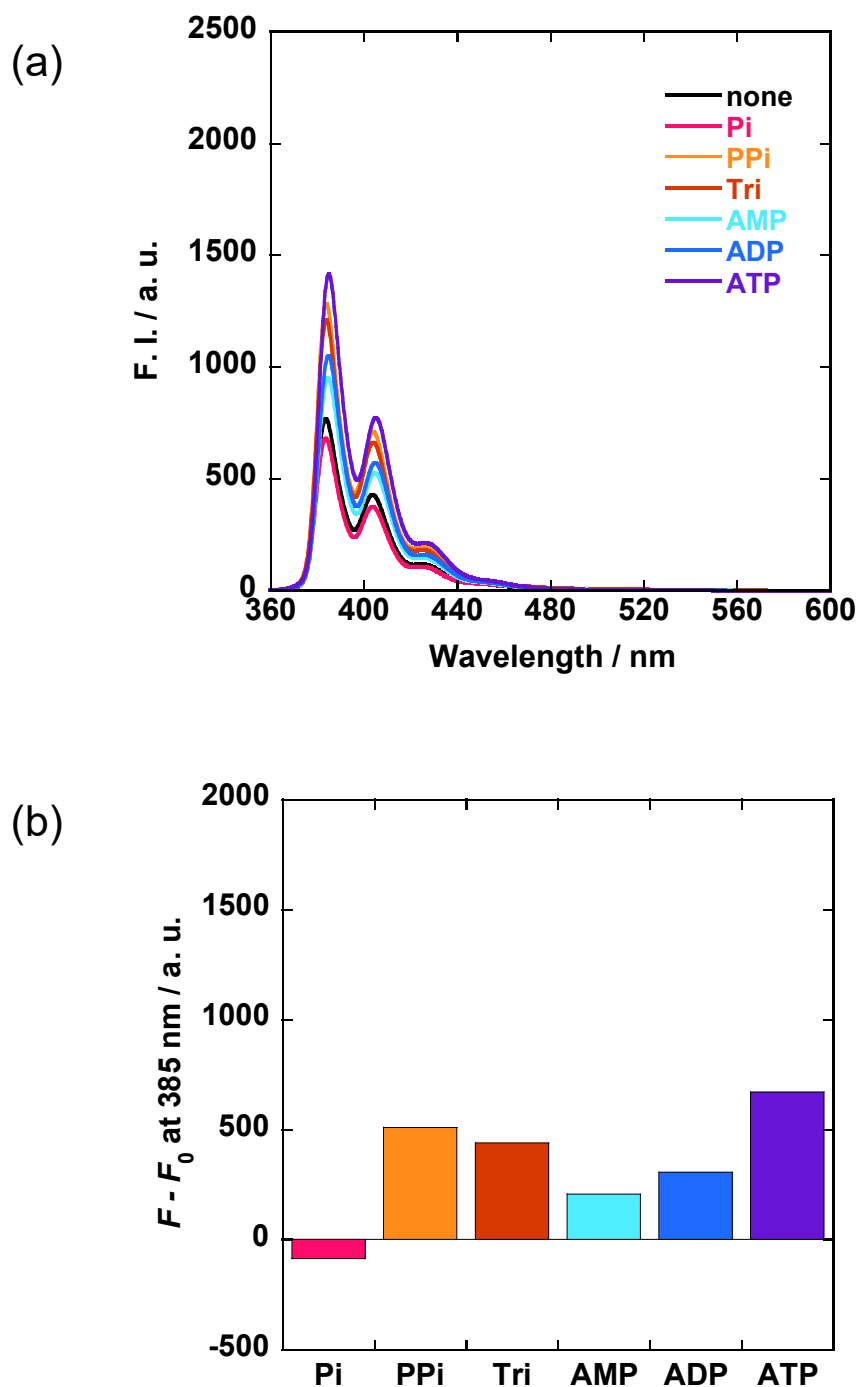

Figure S28. Fluorescence spectra of **Zn-1/FB $\beta$ CyD** in the absence and presence of various 1.0 mM of phosphate derivatives in DMSO/water (1/99 in vol.) (a) and the difference of the fluorescence intensity at 385 nm of **Zn-1/FB $\beta$ CyD** before and after the addition of the phosphate derivatives (b):  $C_1 = 10 \mu\text{M}$ ,  $C_{\text{Zn}} = 10 \mu\text{M}$ ,  $C_{\text{FB}\beta\text{CyD}} = 0.5 \text{ mM}$ ,  $C_{\text{HEPES}} = 5 \text{ mM}$ , pH 7.4,  $T = 25^\circ\text{C}$ , and  $\lambda_{\text{ex}} = 350 \text{ nm}$ .

## ICD spectra

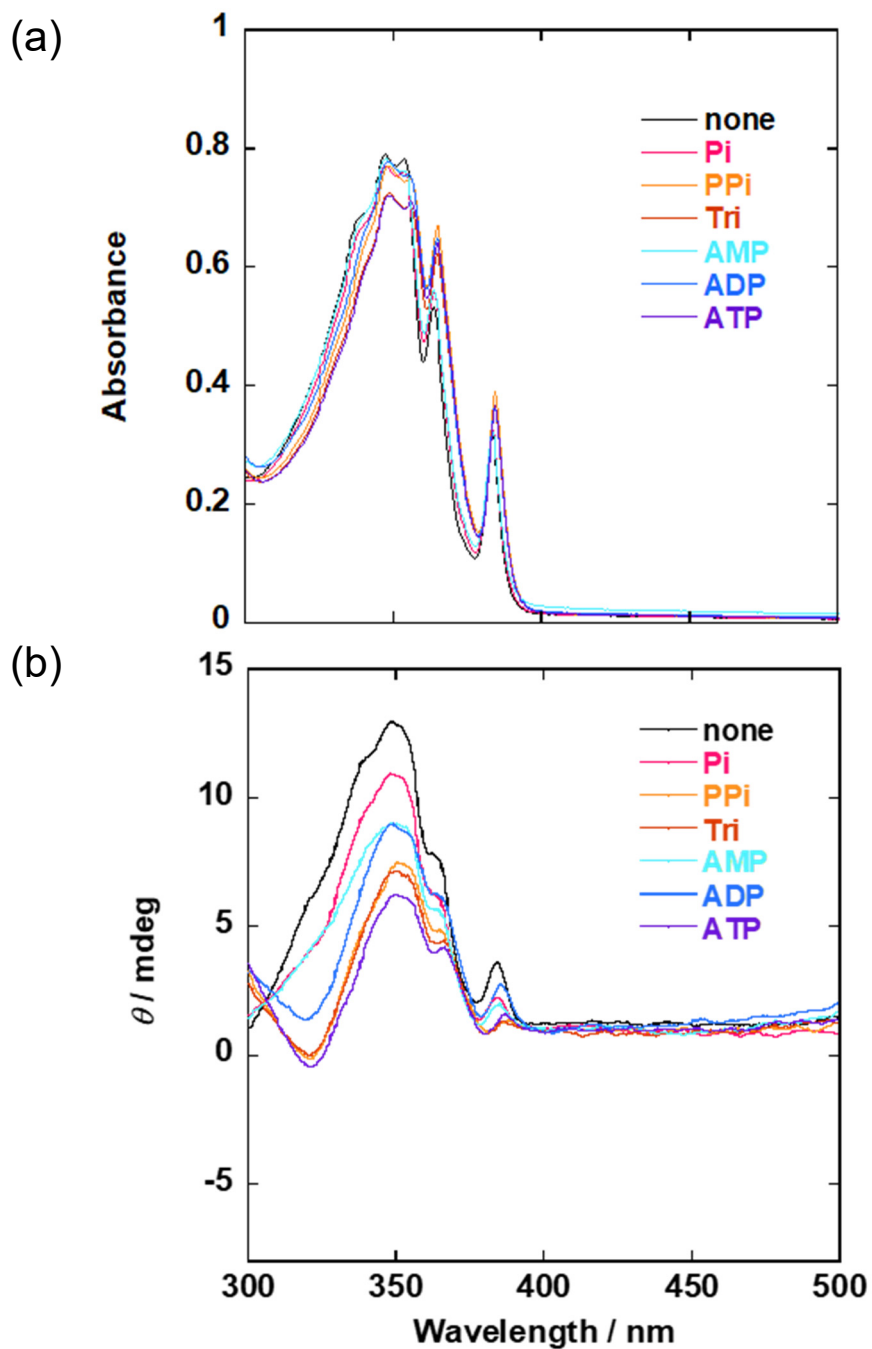

Figure S29. UV-vis absorption (a) and ICD (b) spectra of **Zn-1/FByCyD** in the absence and presence of various 1.0 mM of phosphate derivatives in DMSO/water (1/99 in vol.):  $C_1 = 40 \mu\text{M}$ ,  $C_{\text{Zn}} = 40 \mu\text{M}$ ,  $C_{\text{FByCyD}} = 0.5 \text{ mM}$ ,  $C_{\text{HEPES}} = 5 \text{ mM}$ , pH 7.4, and  $T = 25^\circ\text{C}$ .

## Robustness against apyrase

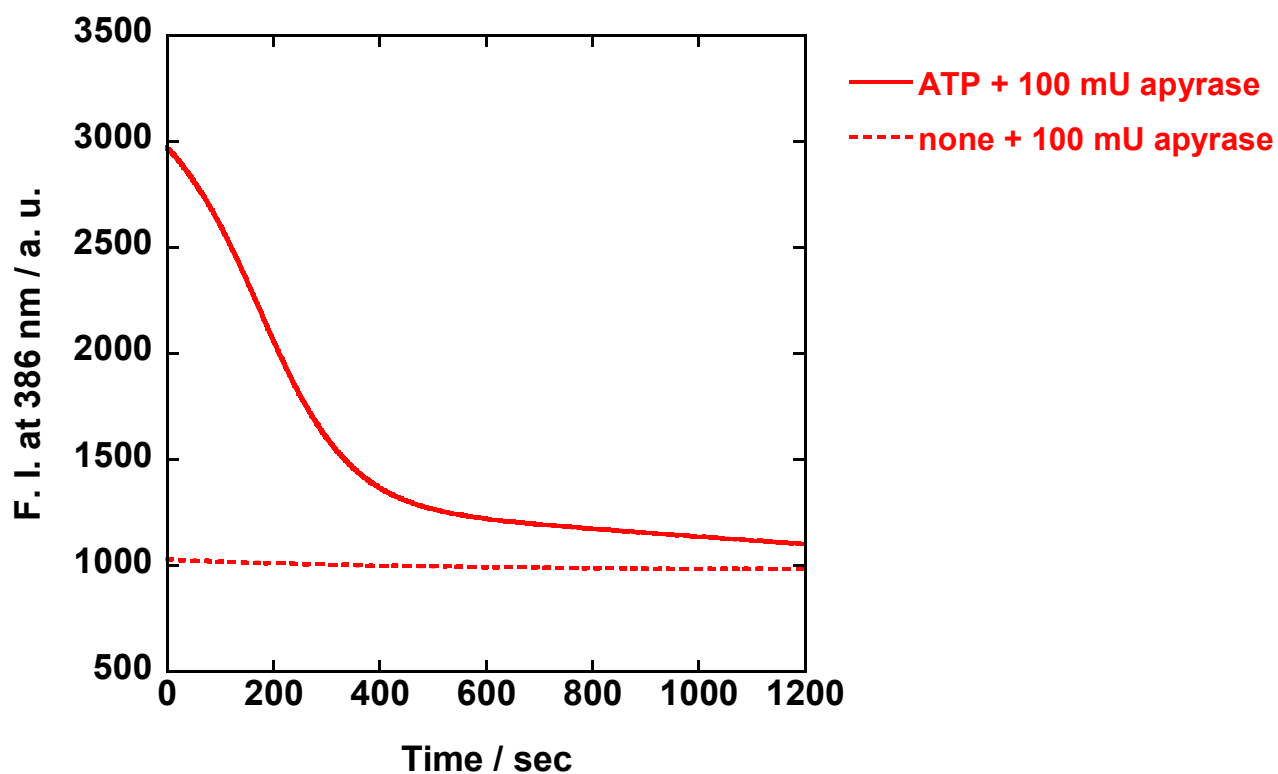

Figure S30. Changes in the fluorescence intensity at 386 nm of **Zn-1/FByCyD** in the absence and presence of ATP (30  $\mu\text{M}$ ) after the additions of apyrase (100 mU) in DMSO/water (1/99 in vol.):  $C_1 = 10 \mu\text{M}$ ,  $C_{\text{Zn}} = 10 \mu\text{M}$ ,  $C_{\text{FByCyD}} = 0.1 \text{ mM}$ ,  $C_{\text{HEPES}} = 5 \text{ mM}$ , pH 7.4,  $T = 25^\circ\text{C}$ , and  $\lambda_{\text{ex}} = 350 \text{ nm}$ .

## Fluorescence after the apyrase addition

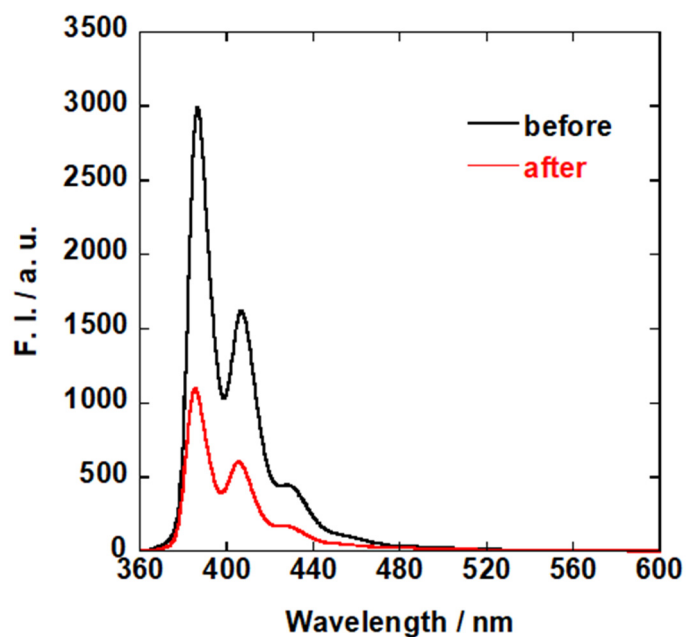

Figure S31. Fluorescence spectra of **Zn-1/FB $\gamma$ CyD** with ATP before and 1200 seconds after the addition of apyrase (100 mU) in DMSO/water (1/99 in vol.):  $C_1 = 10 \mu\text{M}$ ,  $C_{\text{Zn}} = 10 \mu\text{M}$ ,  $C_{\text{ATP}} = 30 \mu\text{M}$ ,  $C_{\text{FB}\gamma\text{CyD}} = 0.1 \text{ mM}$ ,  $C_{\text{HEPES}} = 5 \text{ mM}$ , pH 7.4,  $T = 25^\circ\text{C}$ , and  $\lambda_{\text{ex}} = 350 \text{ nm}$ .

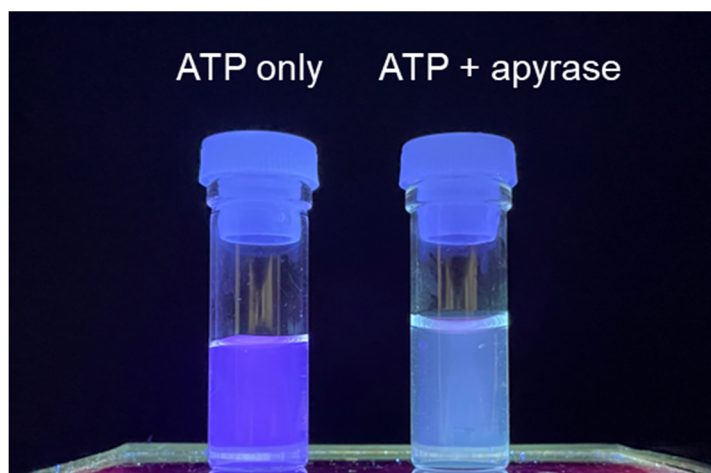

Figure S32. Photograph of the fluorescence of **Zn-1/FB $\gamma$ CyD** with ATP before and 1200 seconds after the addition of apyrase (100 mU) in DMSO/water (1/99 in vol.) with 365 nm UV light:  $C_1 = 10 \mu\text{M}$ ,  $C_{\text{Zn}} = 10 \mu\text{M}$ ,  $C_{\text{ATP}} = 30 \mu\text{M}$ ,  $C_{\text{FB}\gamma\text{CyD}} = 0.1 \text{ mM}$ ,  $C_{\text{HEPES}} = 5 \text{ mM}$ , pH 7.4, and  $T = 25^\circ\text{C}$

- 1 H. Liang, Z. Yao, W. Ge, Y. Qiao, L. Zhang, Z. Cao and H. C. Wu, Selective and sensitive detection of picric acid based on a water-soluble fluorescent probe, *RSC Adv.*, 2016, **6**, 38328–38331.
- 2 K. Aoki, R. Osako, J. Deng, T. Hayashita, T. Hashimoto and Y. Suzuki, Phosphate-sensing with (di-(2-picolyl)amino)quinazolines based on a fluorescence on-off system, *RSC Adv.*, 2020, **10**, 15299–15306.
